# Supplementary material for: Diastereoselective three-component 1,3-dipolar cycloaddition: concise synthesis of functionalized tetrahydrocarboline-fused spirooxindoles
Source: Royal Society of Chemistry journal article supplement (doi:10.1039/d4ob02099e), 2025-01-01

## *Supplementary Information*

### Diastereoselective Three-Component 1,3-Dipolar Cycloaddition: Concise Synthesis of Functionalized Tetrahydrocarboline-fused Spirooxindoles

Yongchao Wang,<sup>\*a</sup> Lihua Zheng,<sup>a</sup> Rongmei Zi,<sup>a</sup> Yanqin Niu,<sup>a</sup> Shuyuan Yang,<sup>a</sup>  
Donghua Hu<sup>\*a</sup> and Jianwei Dong<sup>\*b</sup>

<sup>a</sup> Yunnan Key Laboratory of Modern Separation Analysis and Substance Transformation, College of Chemistry and Chemical Engineering, Yunnan Normal University, Kunming 650500, Yunnan Province, P.R. China.

<sup>b</sup> College of Chemistry and Environmental Science, Qujing Normal University, Qujing, 655011, P. R. China.

\* Correspondence:

Yongchao Wang (ycwang@ynnu.edu.cn; yongchaowang126@126.com)

Donghua Hu (hudong-hua8888@126.com)

Jianwei Dong (jwdongyn@mail.qjnu.edu.cn)

*Table of contents*

|                                                                                                    |            |
|----------------------------------------------------------------------------------------------------|------------|
| <b>1. <math>^1\text{H}</math> and <math>^{13}\text{C}</math> NMR spectra for compounds 4 .....</b> | <b>S3</b>  |
| <b>2. <math>^1\text{H}</math> and <math>^{13}\text{C}</math> NMR spectra for compounds 5 .....</b> | <b>S29</b> |
| <b>3. Single crystal X-ray diffraction study data of compound 4i .....</b>                         | <b>S39</b> |

# 1. $^1\text{H}$ and $^{13}\text{C}$ NMR spectra for compounds 4

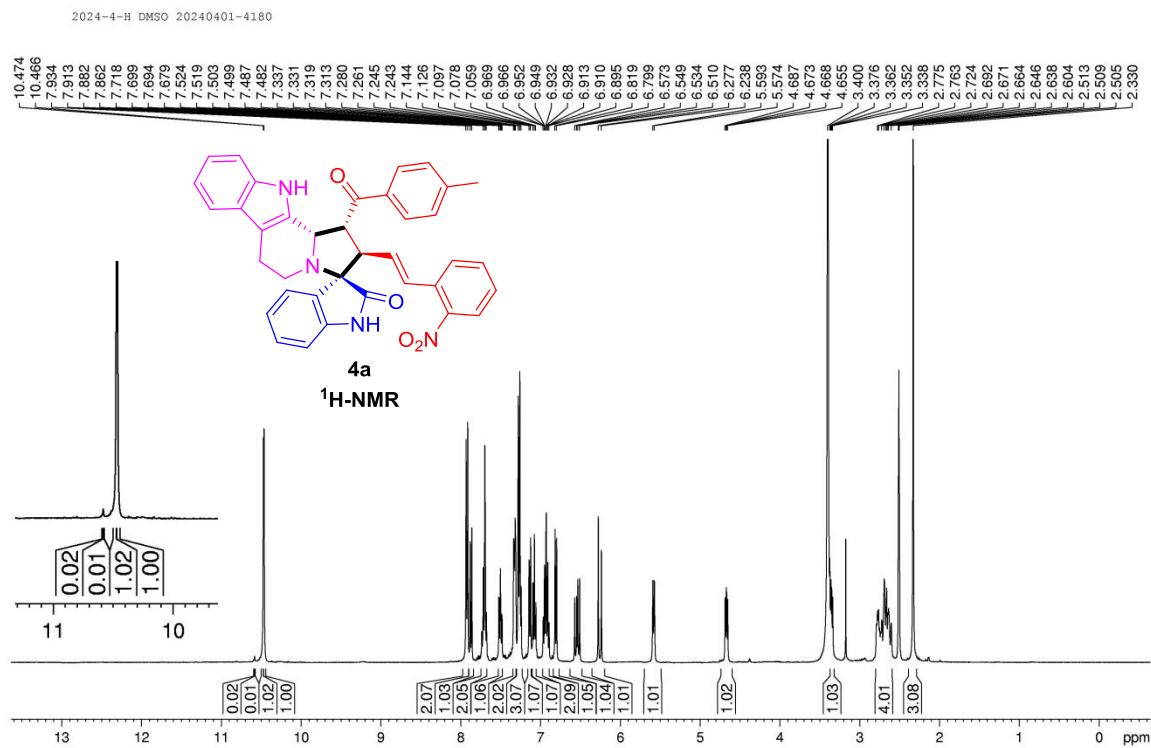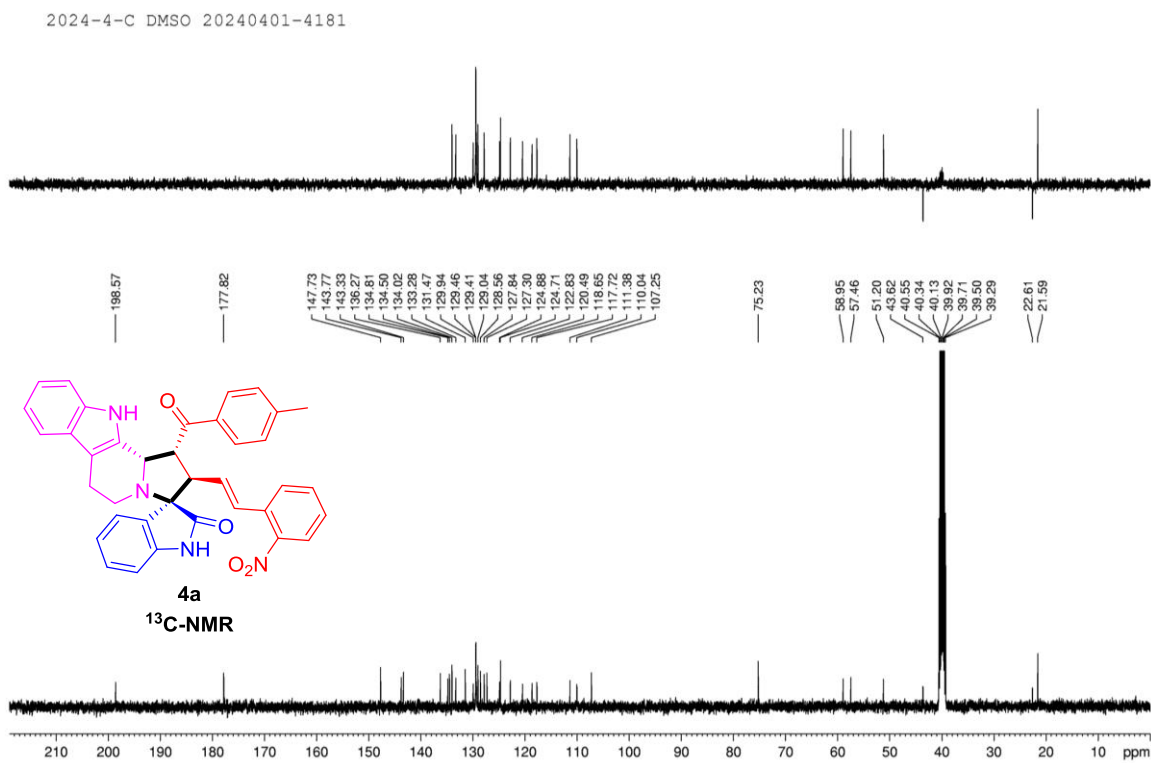

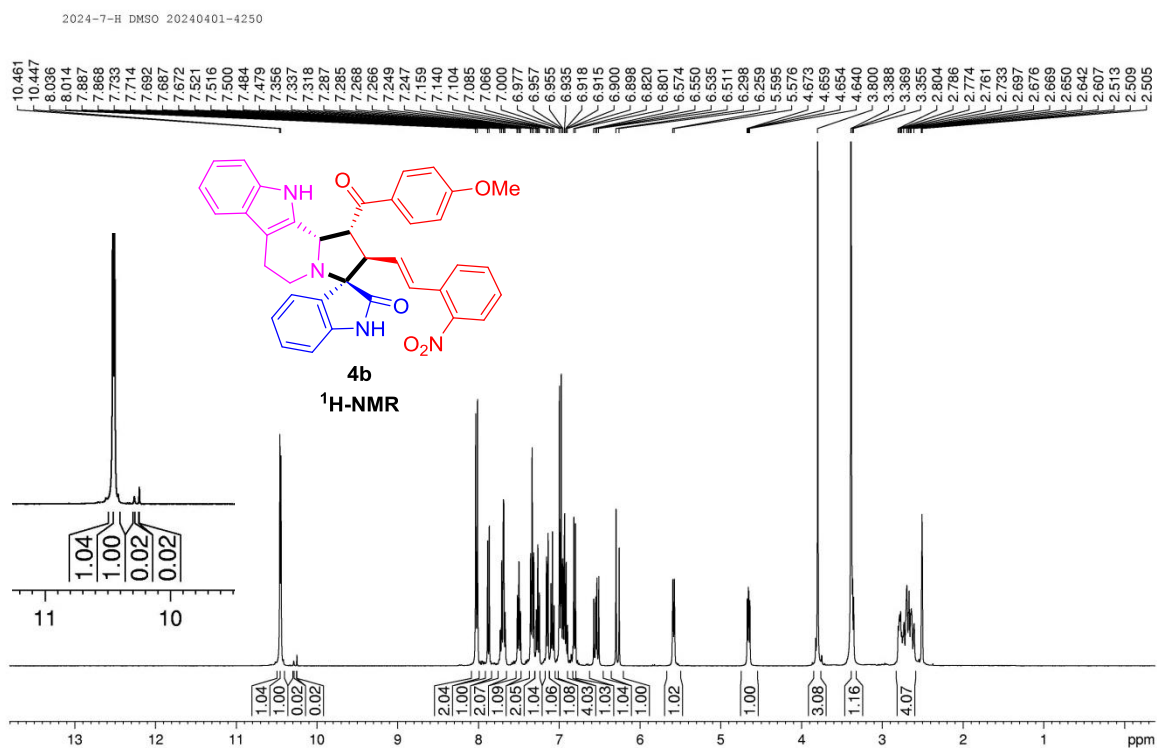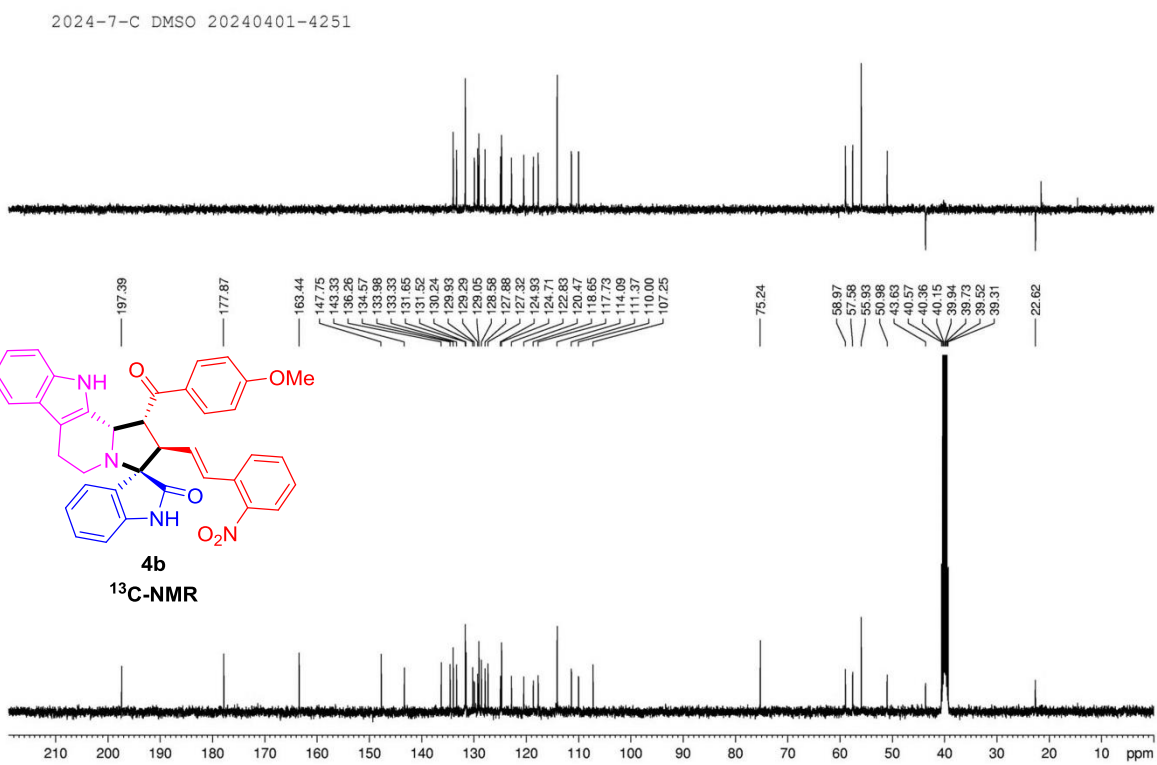

2024-2-H DMSO 20240401-4210

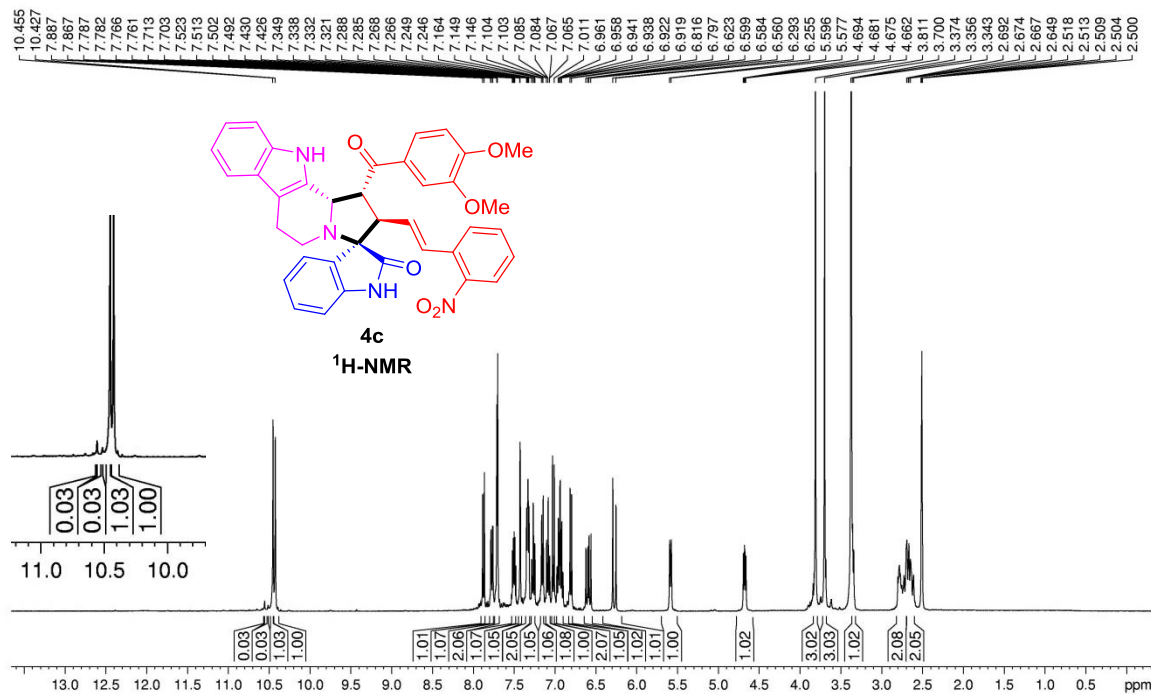

2024-2-C DMSO 20240401-4211

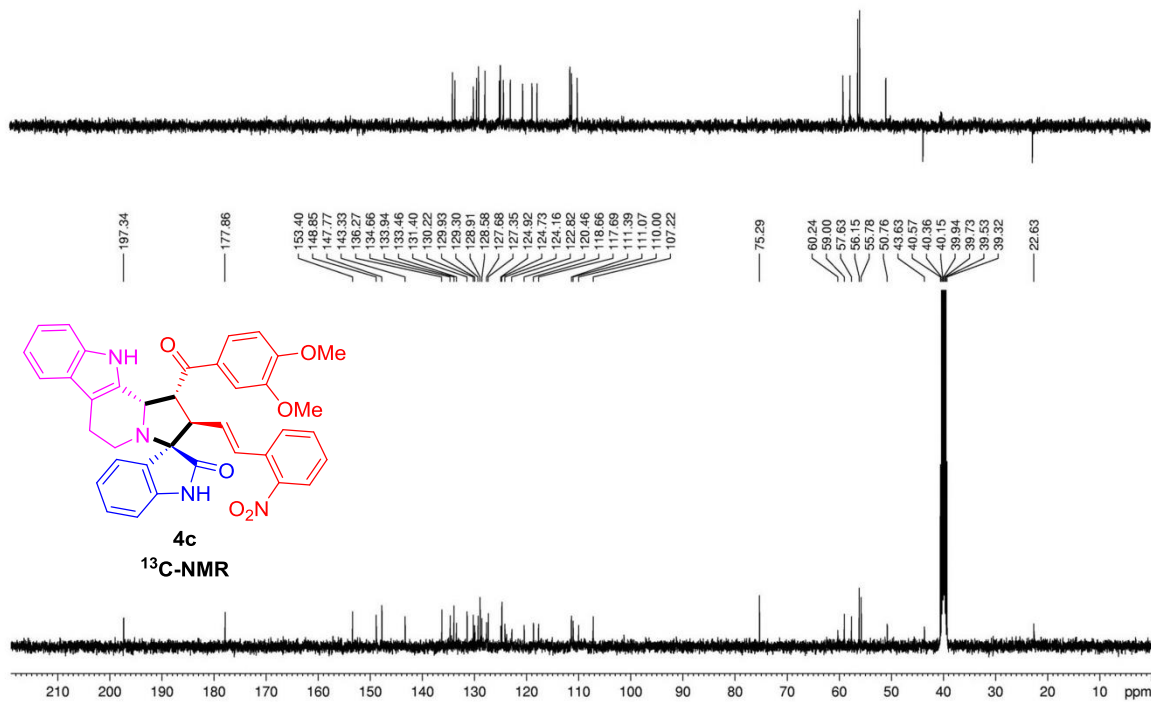

2024-12-H DMSO 20240401-4320

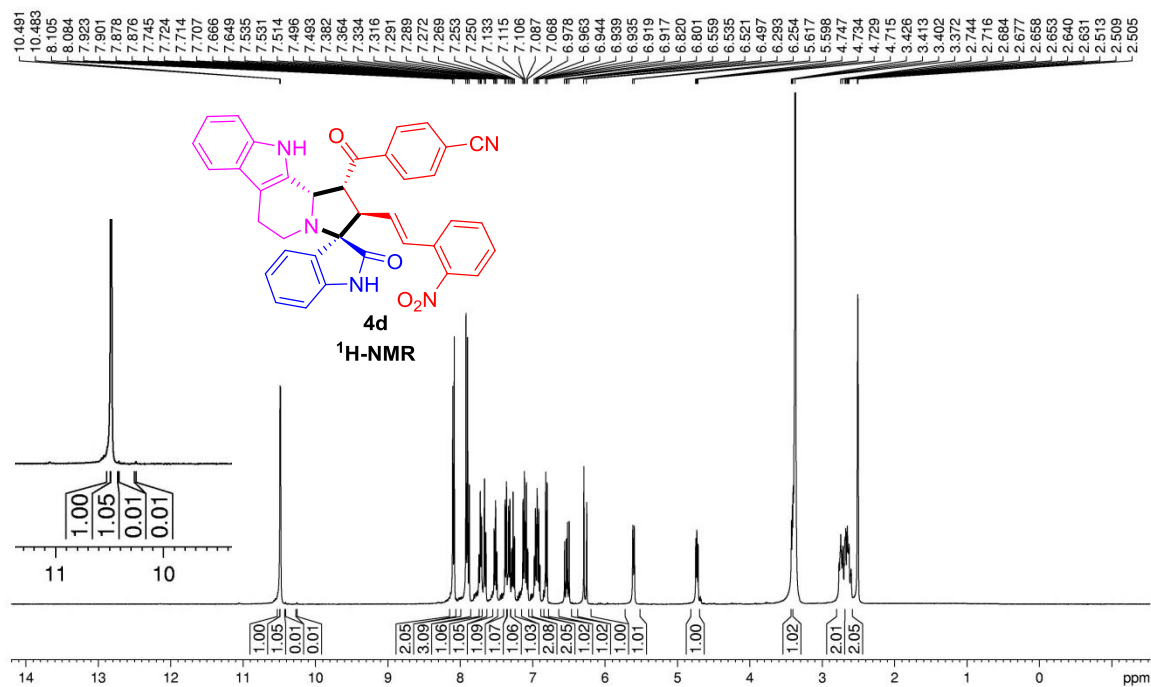

2024-12-C DMSO 20240401-4321

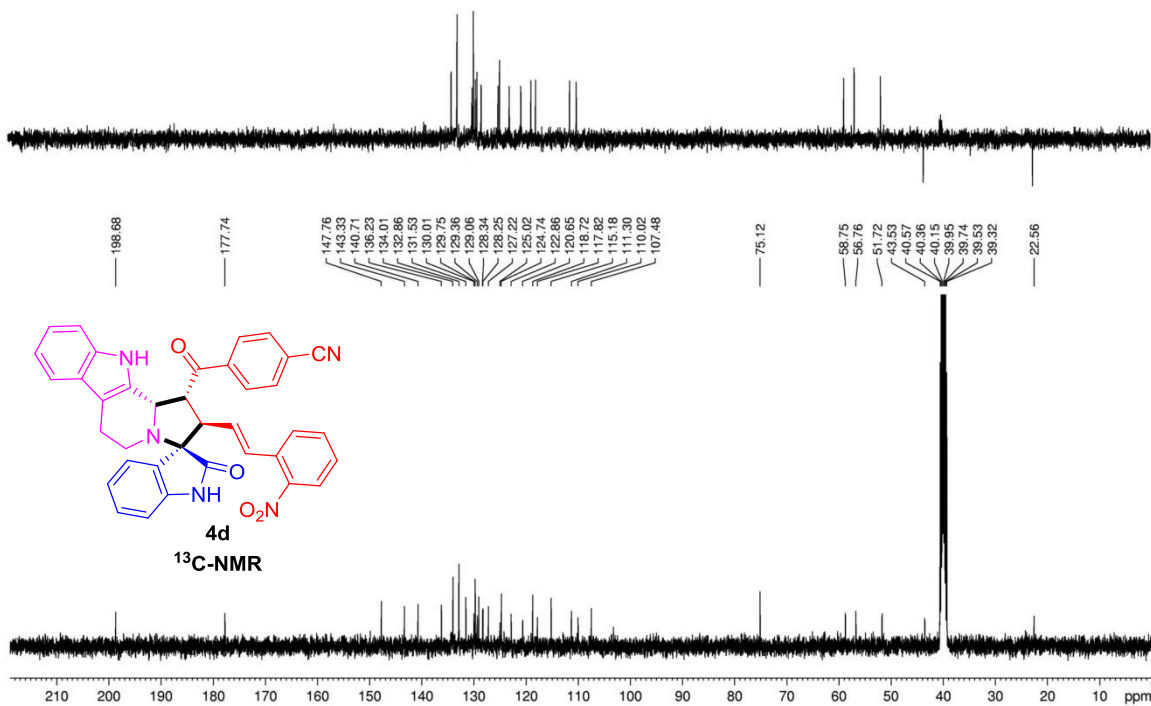

2024-13-H DMSO 20240401-4270

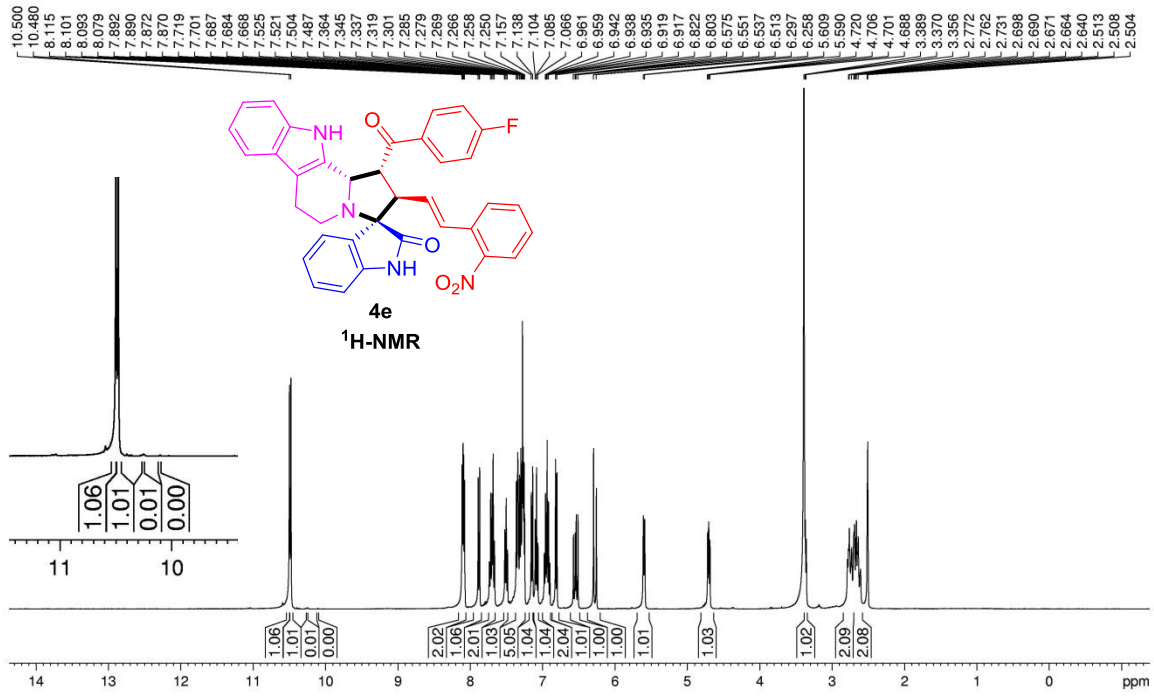

2024-13-C DMSO 20240401-4271

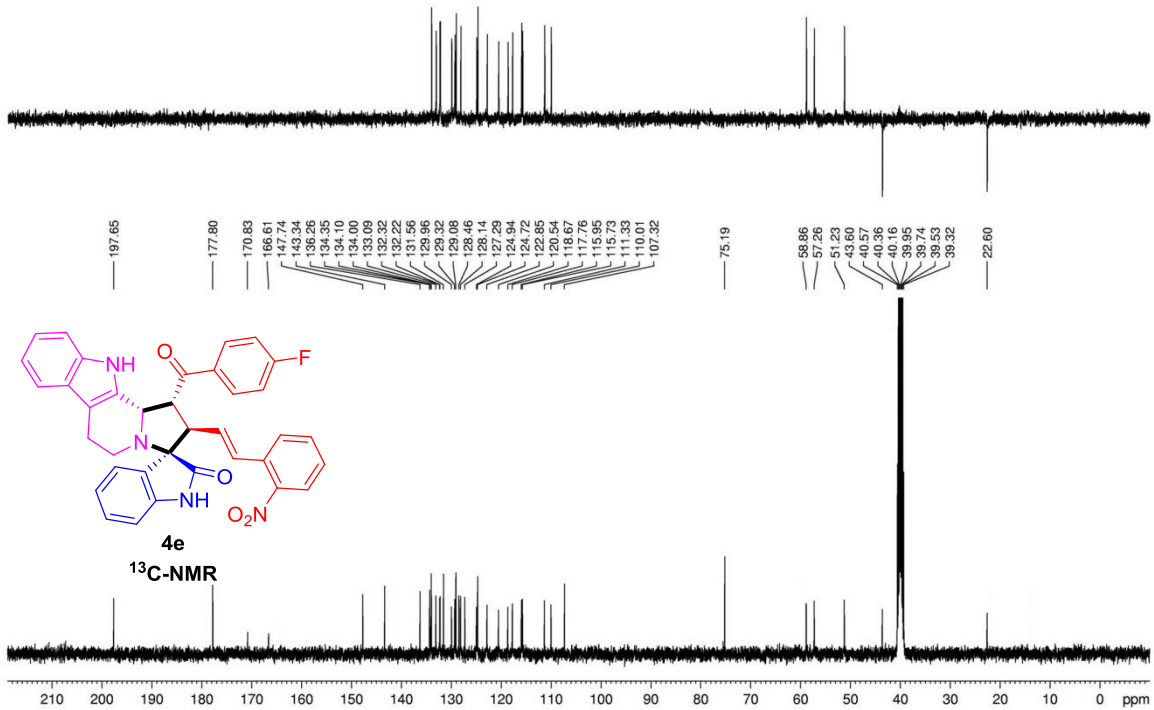

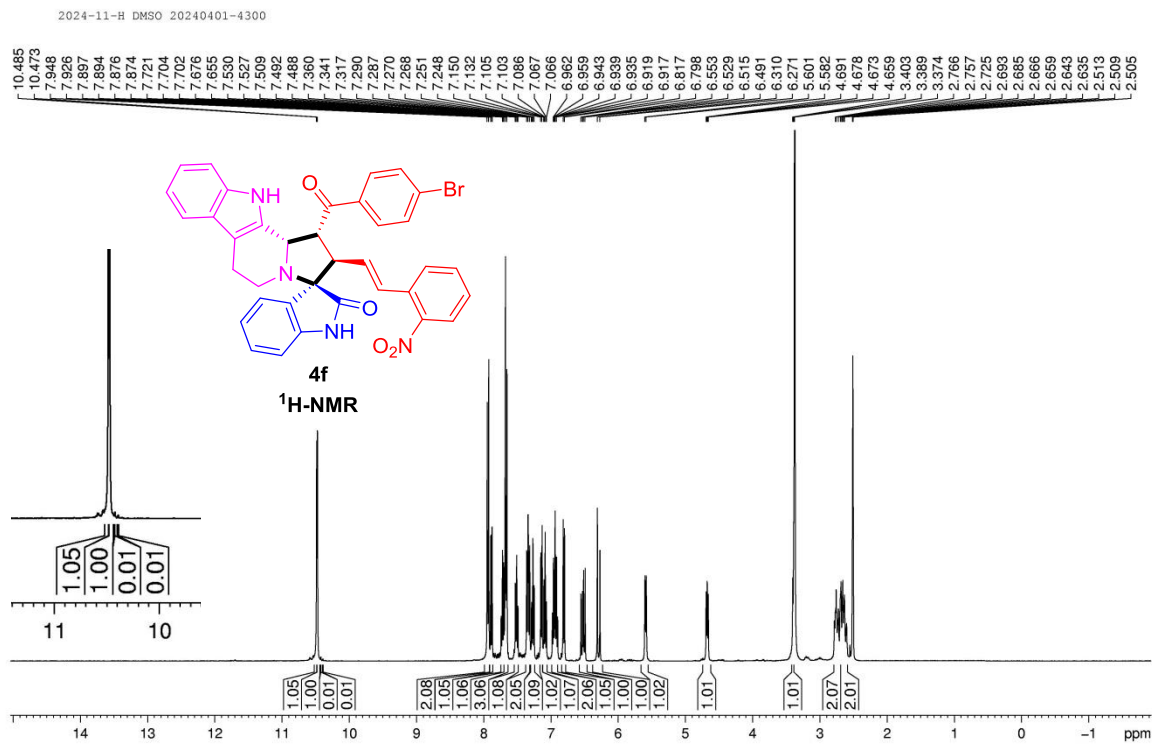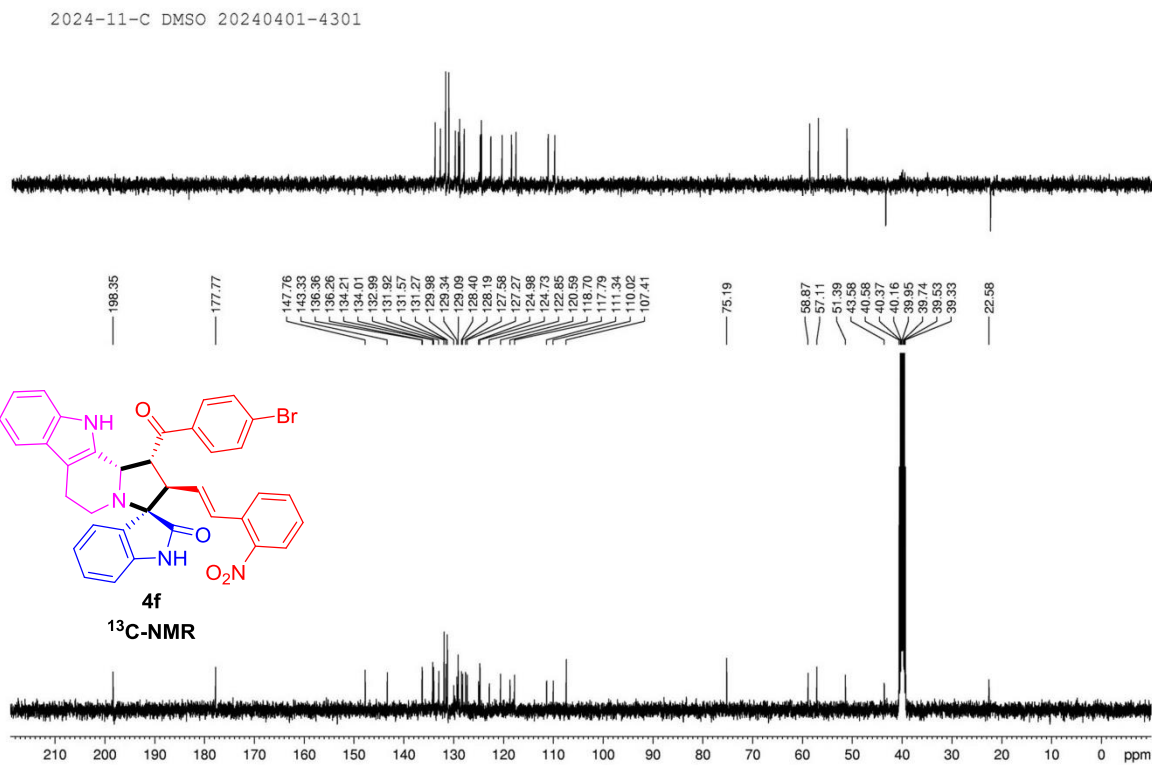



2024-5-H DMSO 20240401-4140

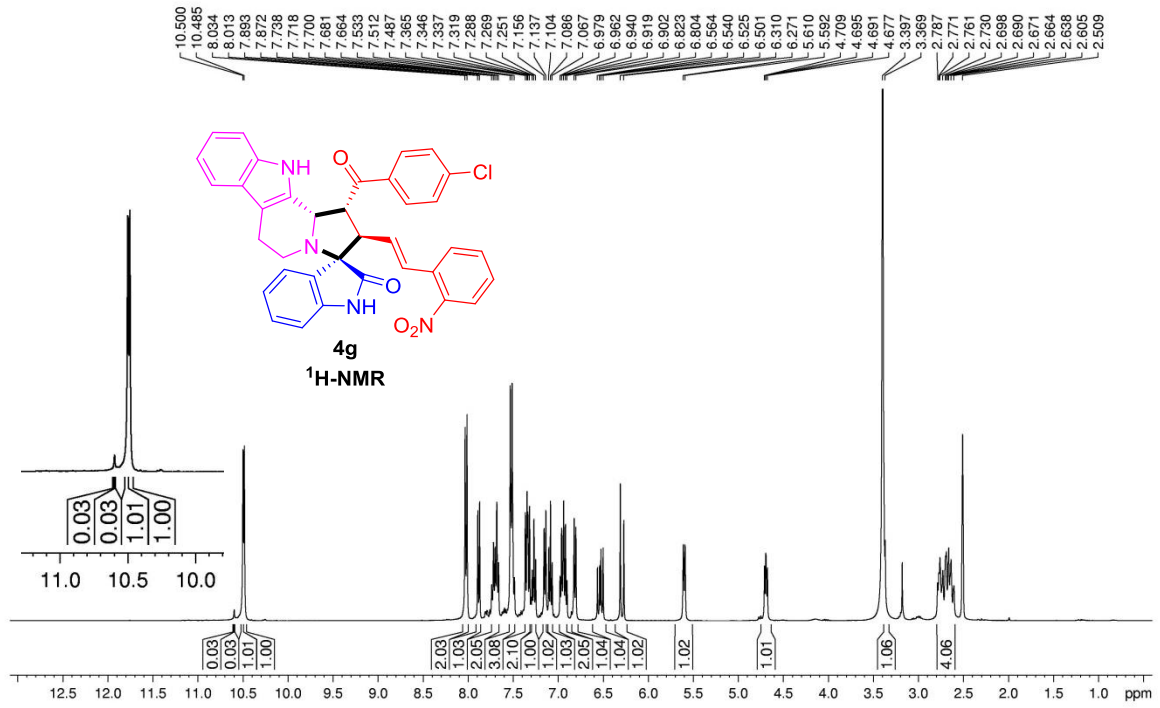

2024-5-C DMSO 20240401-4141

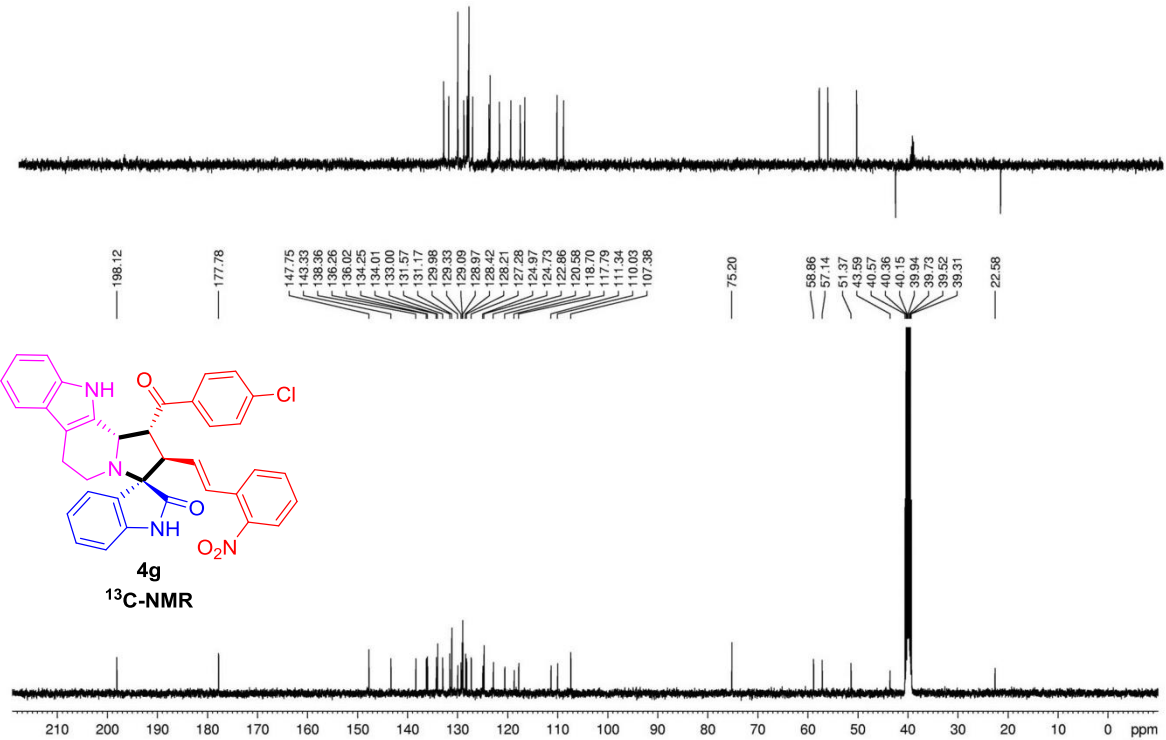

2024-34-H DMSO 20240401-4460

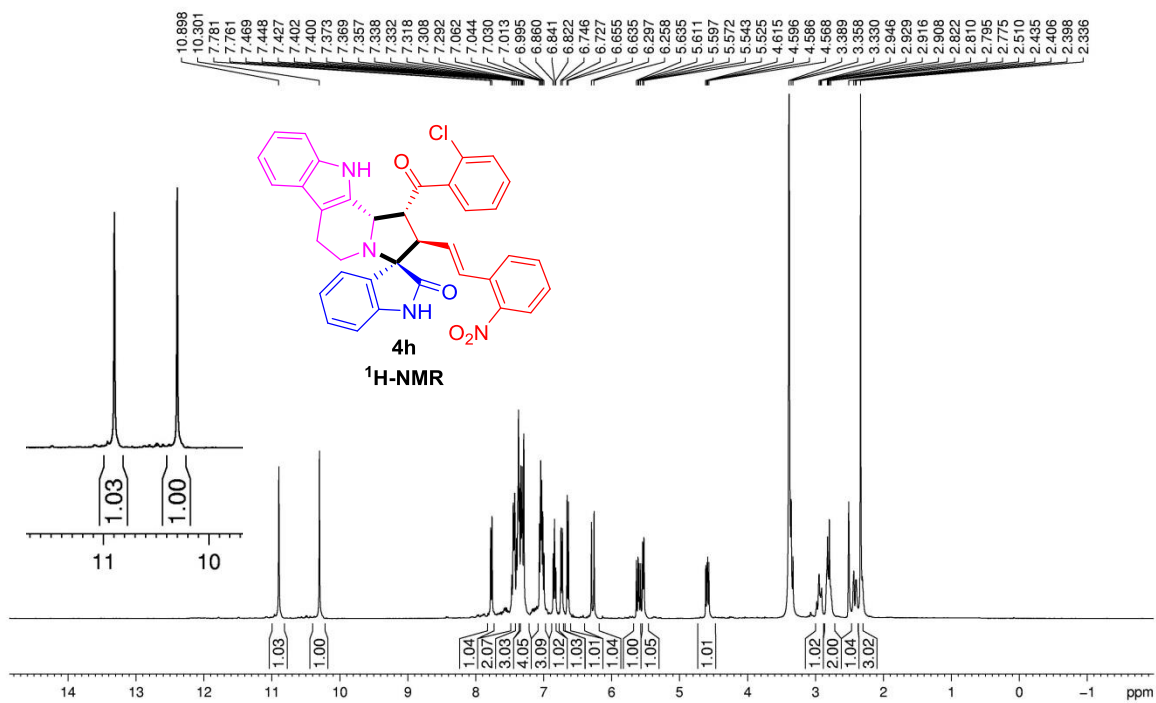

2024-34-C DMSO 20240401-4461

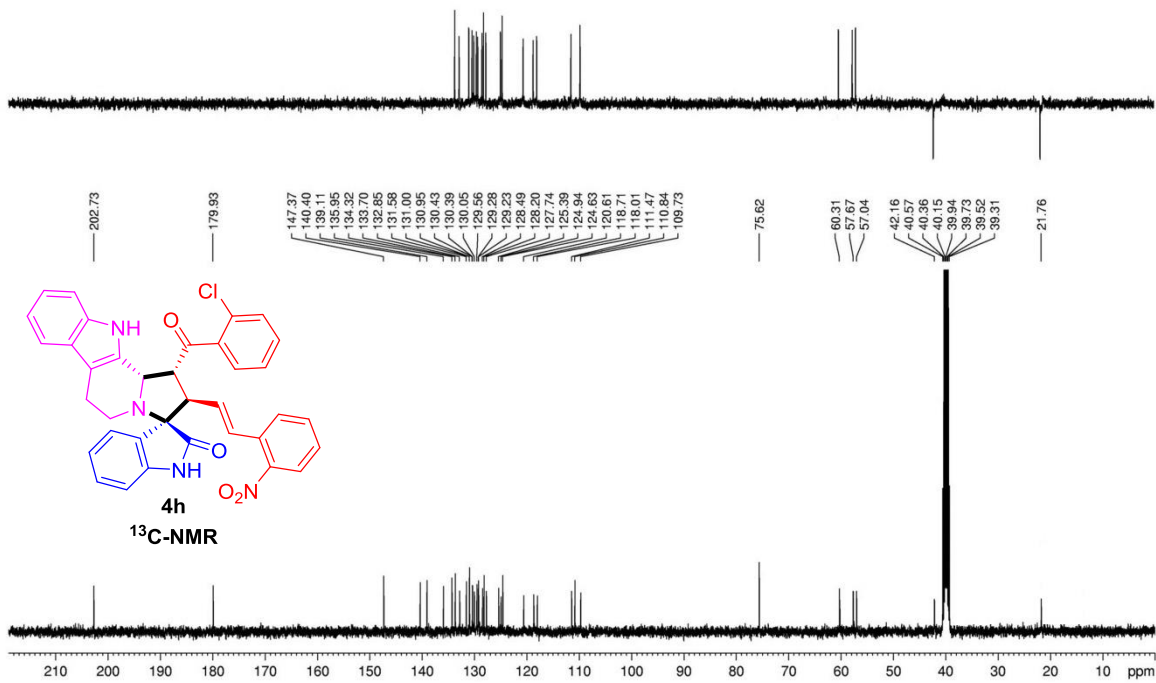

2024-10-H DMSO 20240401-4240

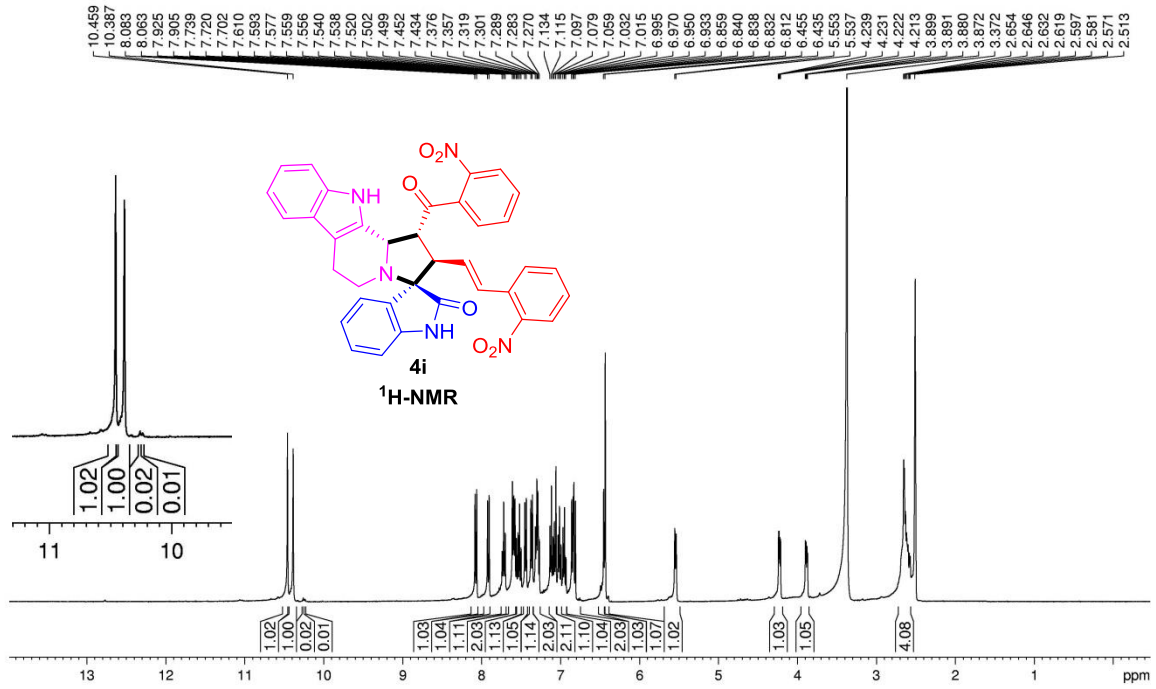

2024-10-C DMSO 20240401-4241

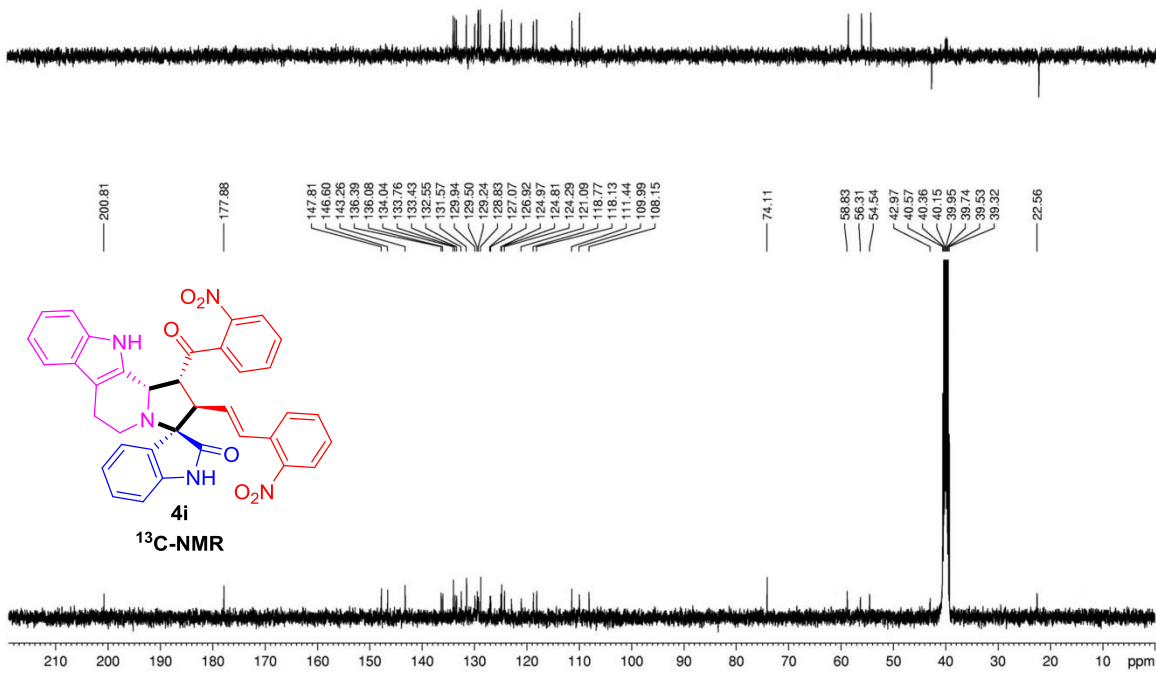

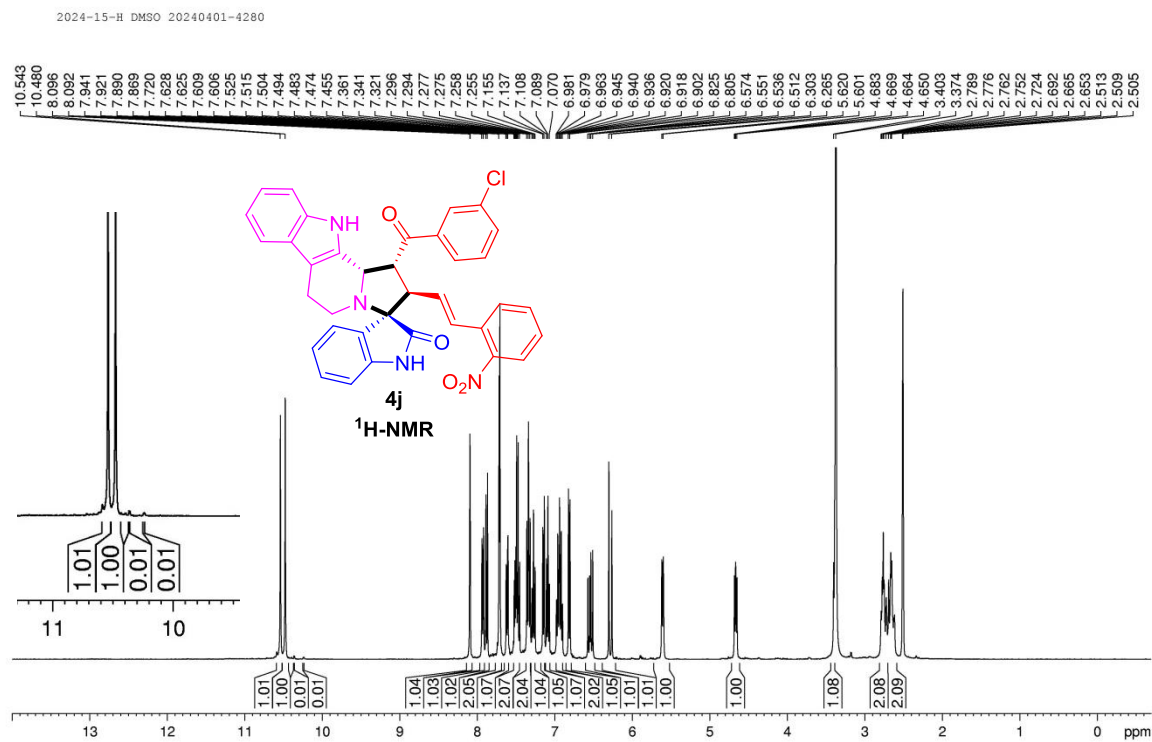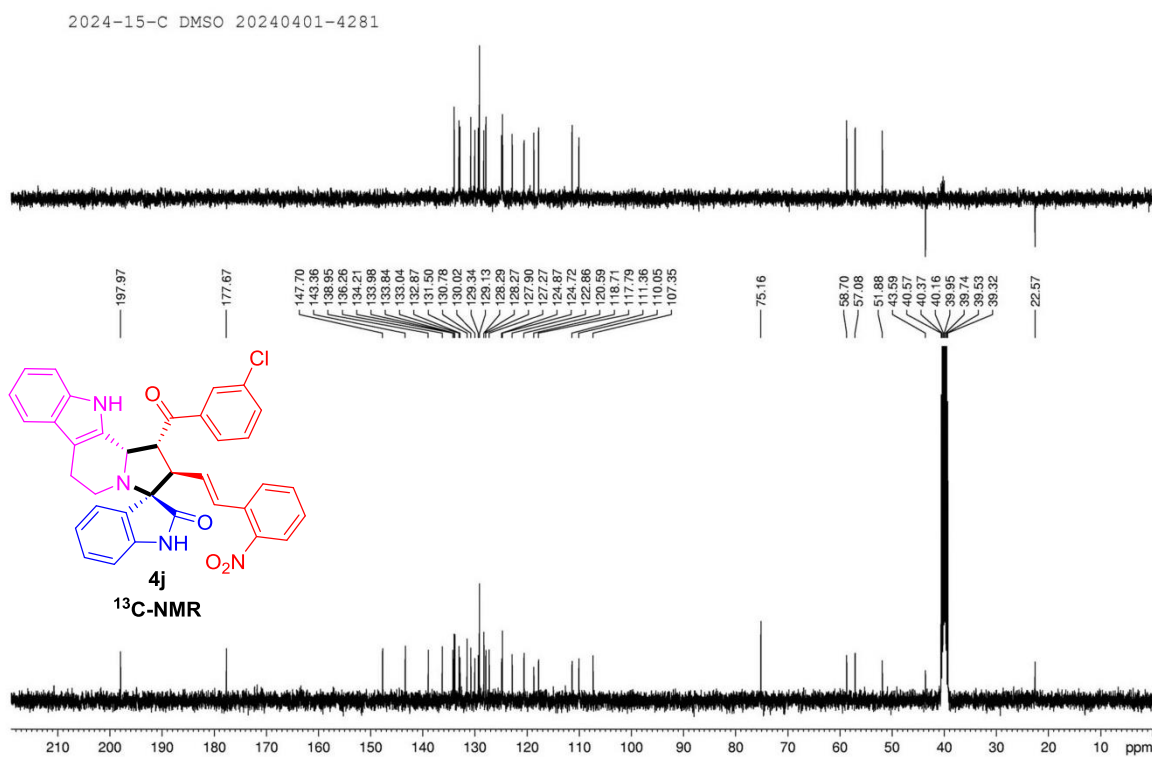

2024-18-H DMSO 20240401-4290

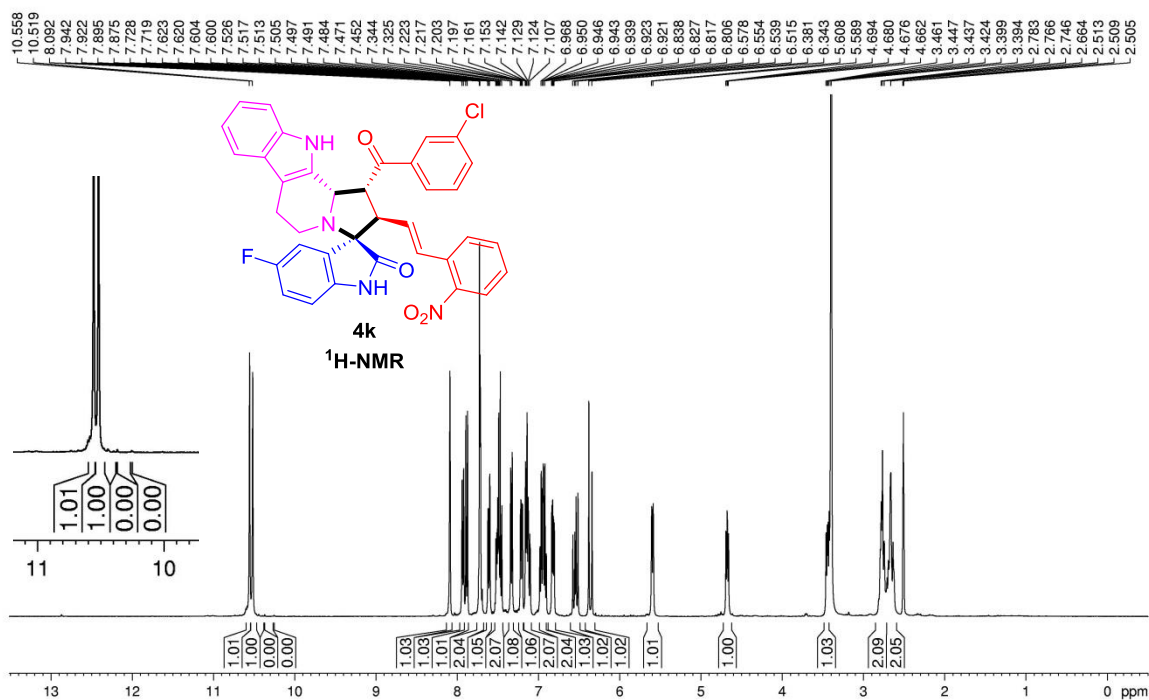

2024-18-C DMSO 20240401-4291

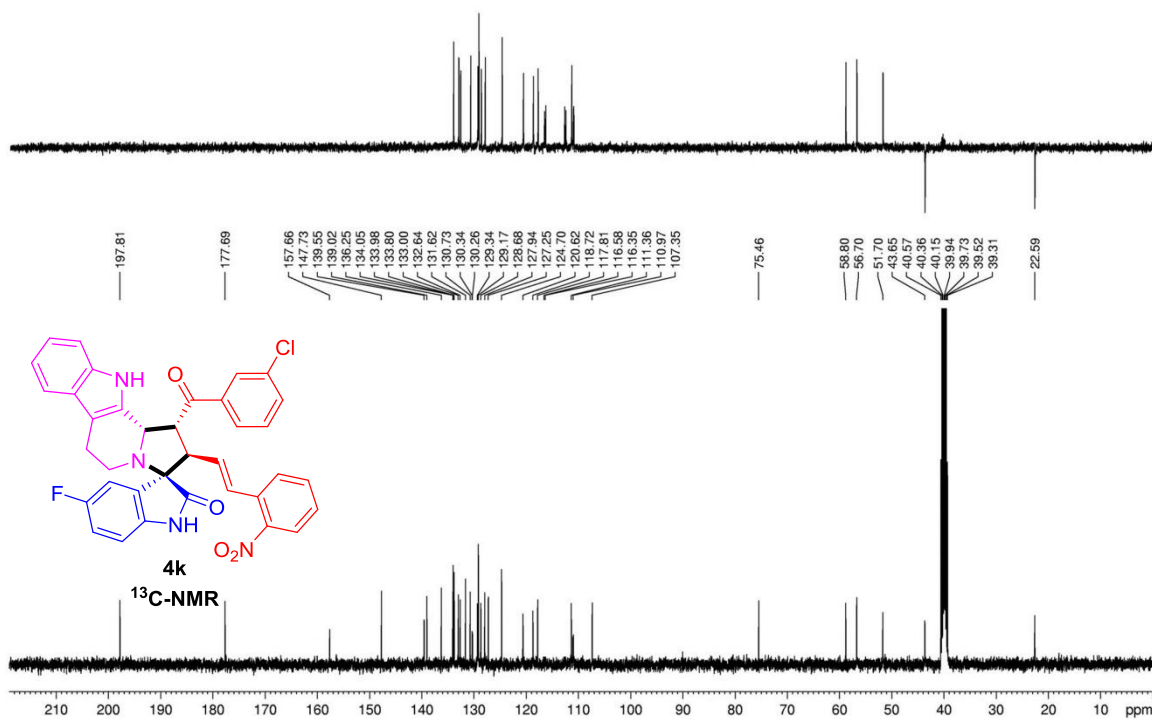

2024-19-H DMSO 20240401-4260

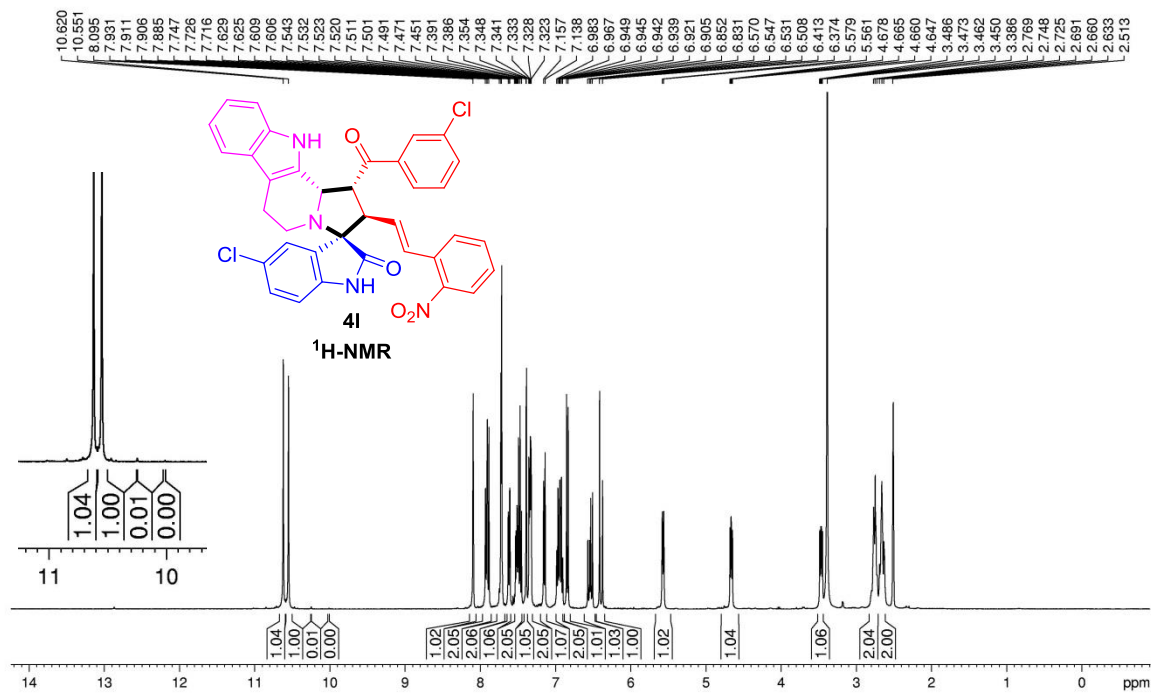

2024-19-C DMSO 20240401-4261

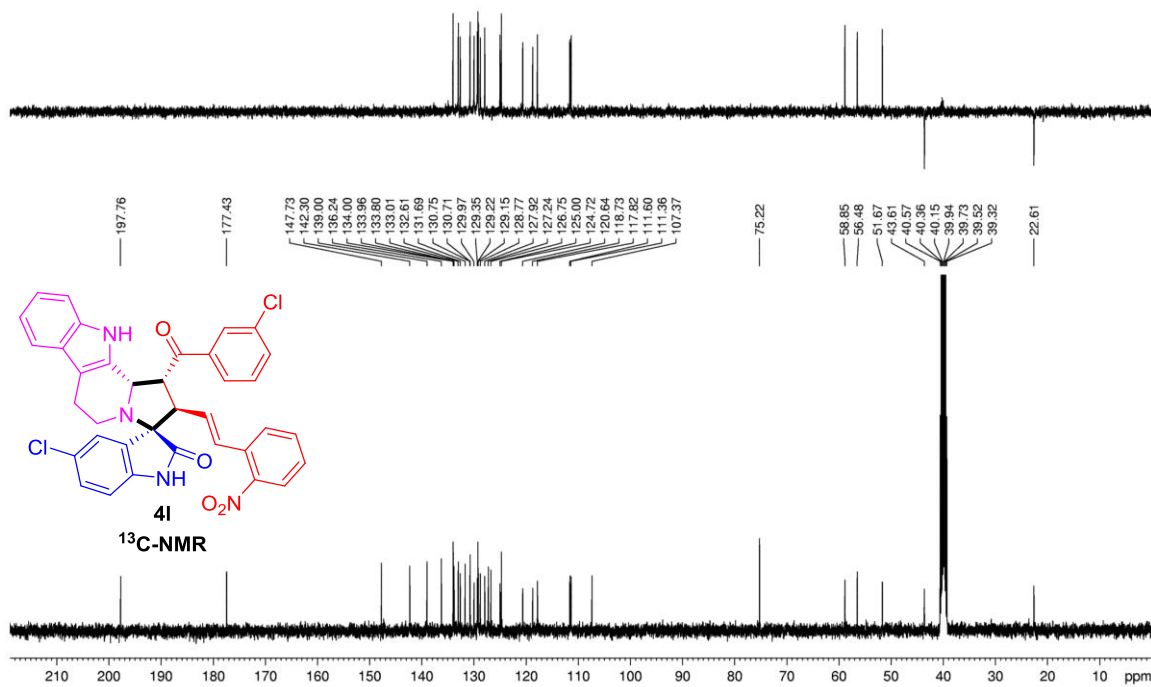

2024-21-H DMSO 20240401-4360

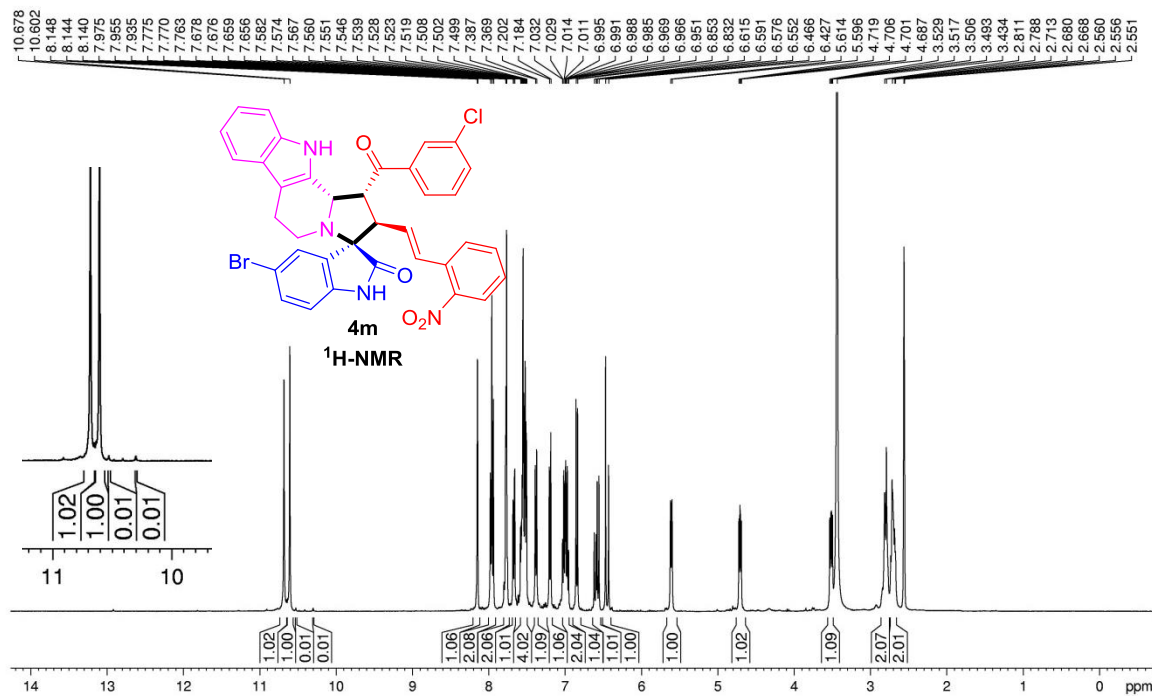

2024-21-C DMSO 20240401-4361

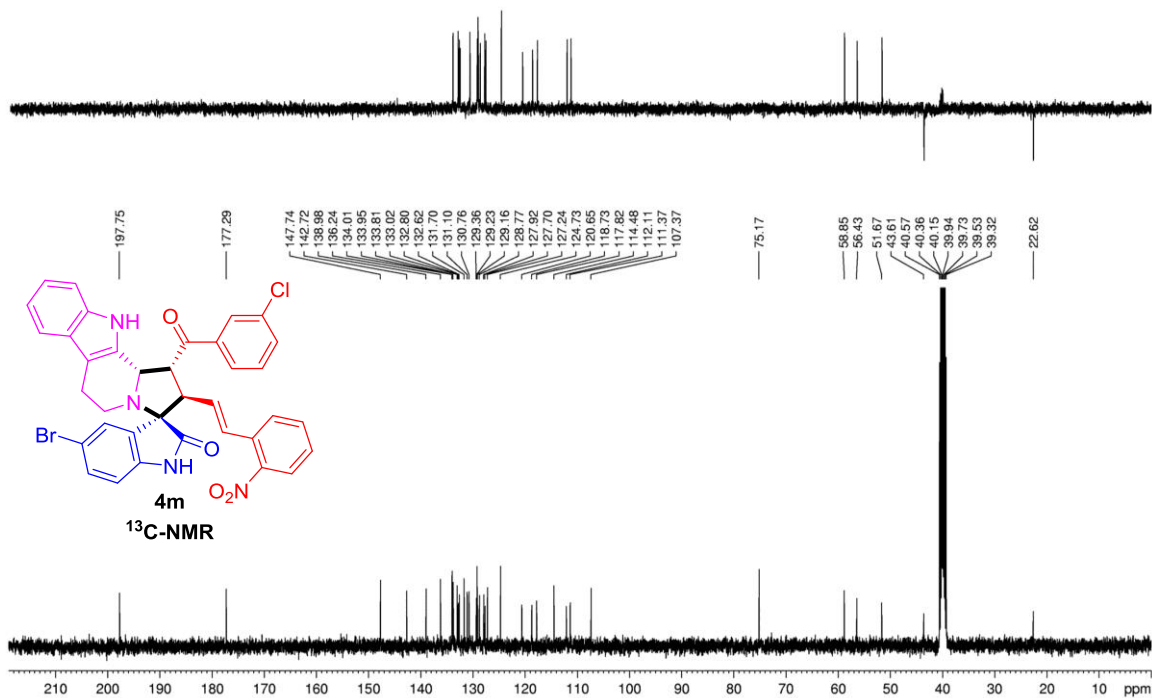

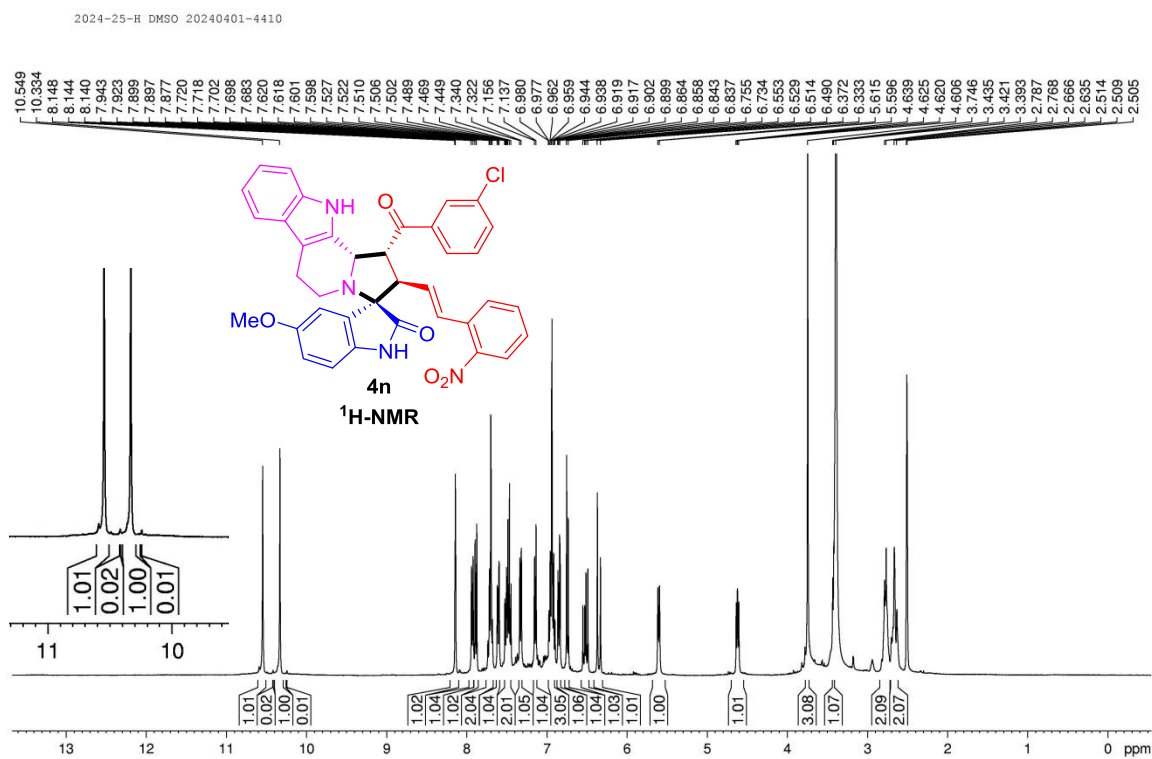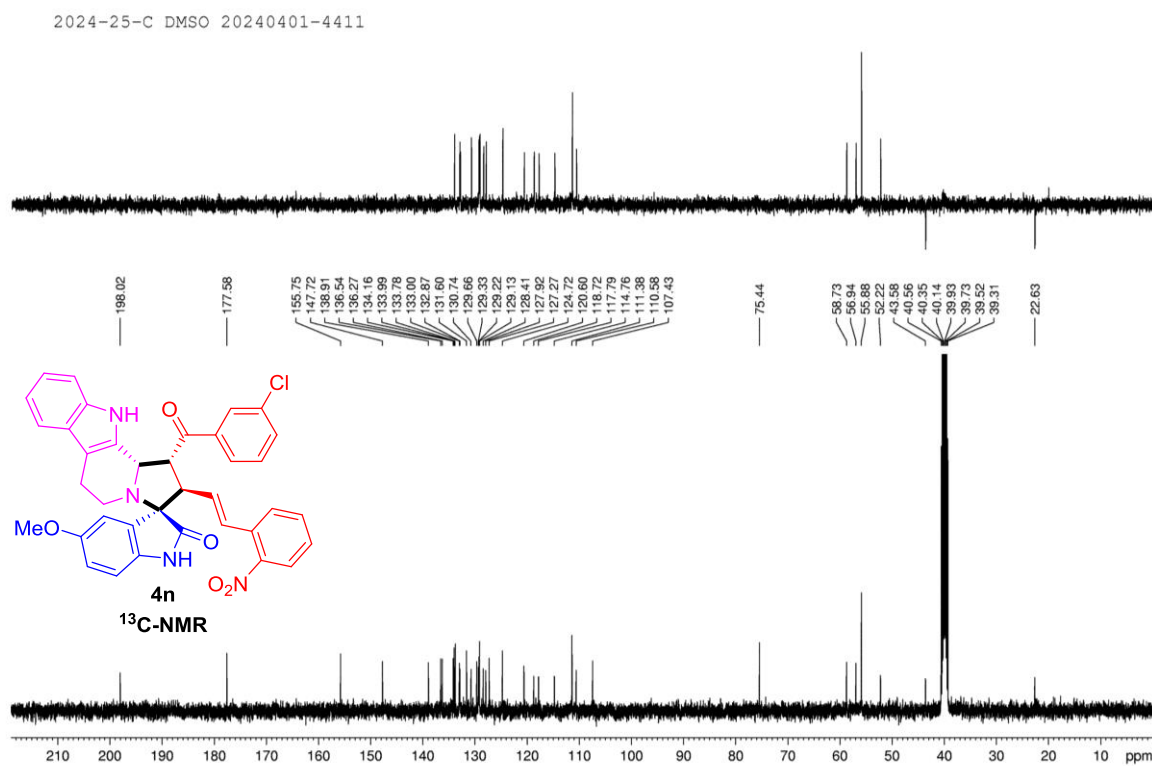



2024-24-H DMSO 20240401-4510

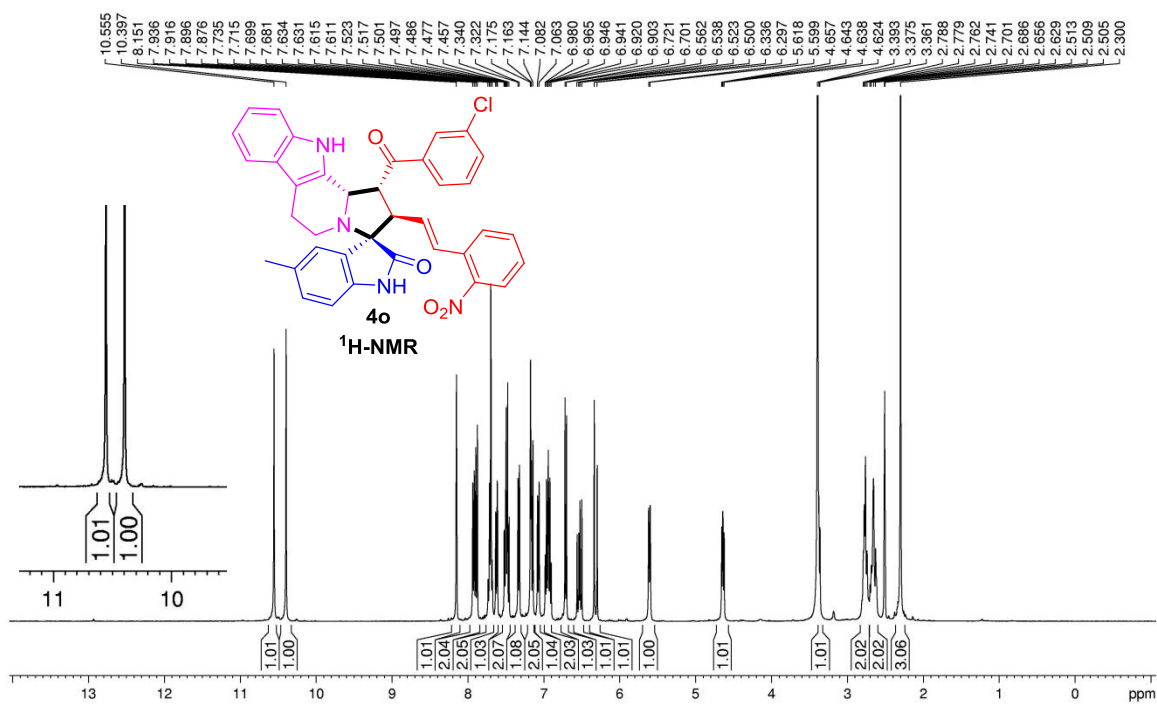

2024-24-H DMSO 20240401-4511

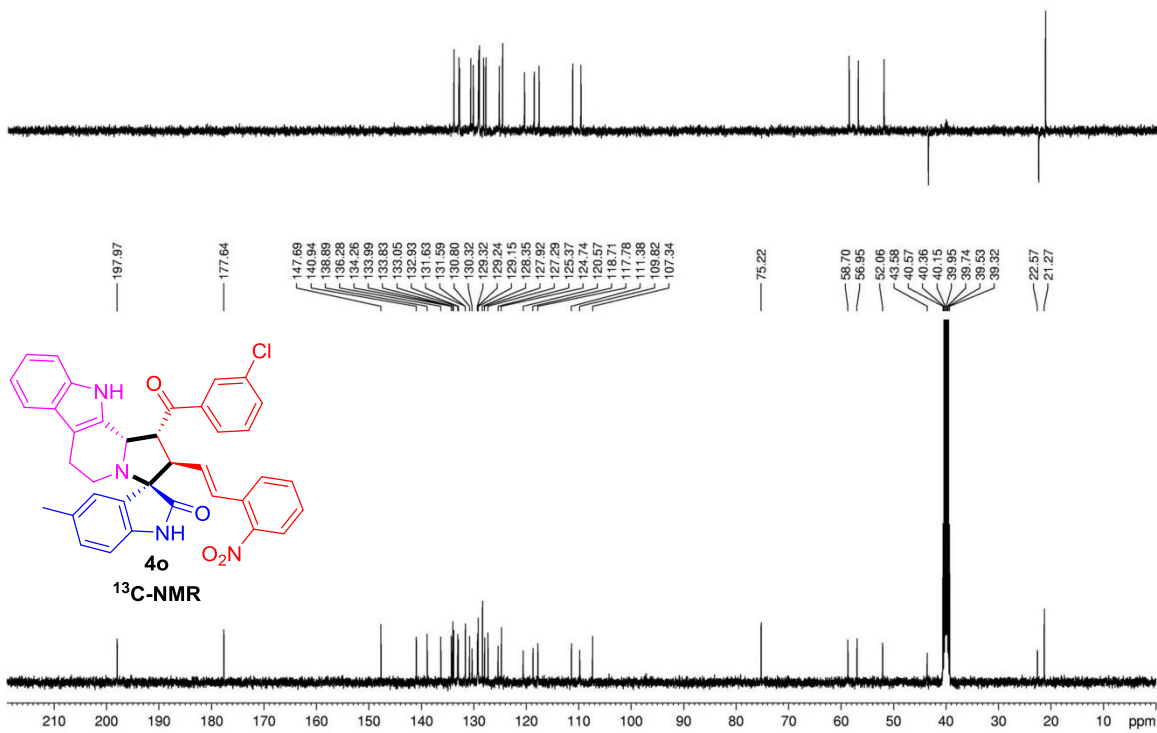

2024-26-H DMSO 20240401-4380

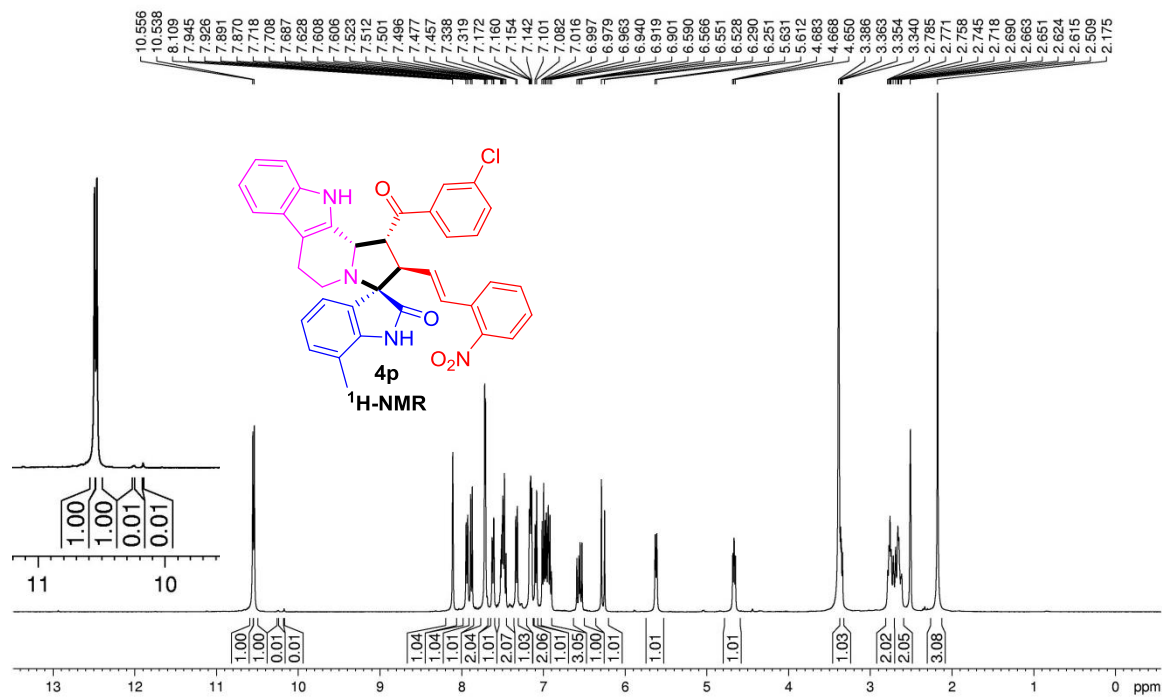

2024-26-C DMSO 20240401-4381

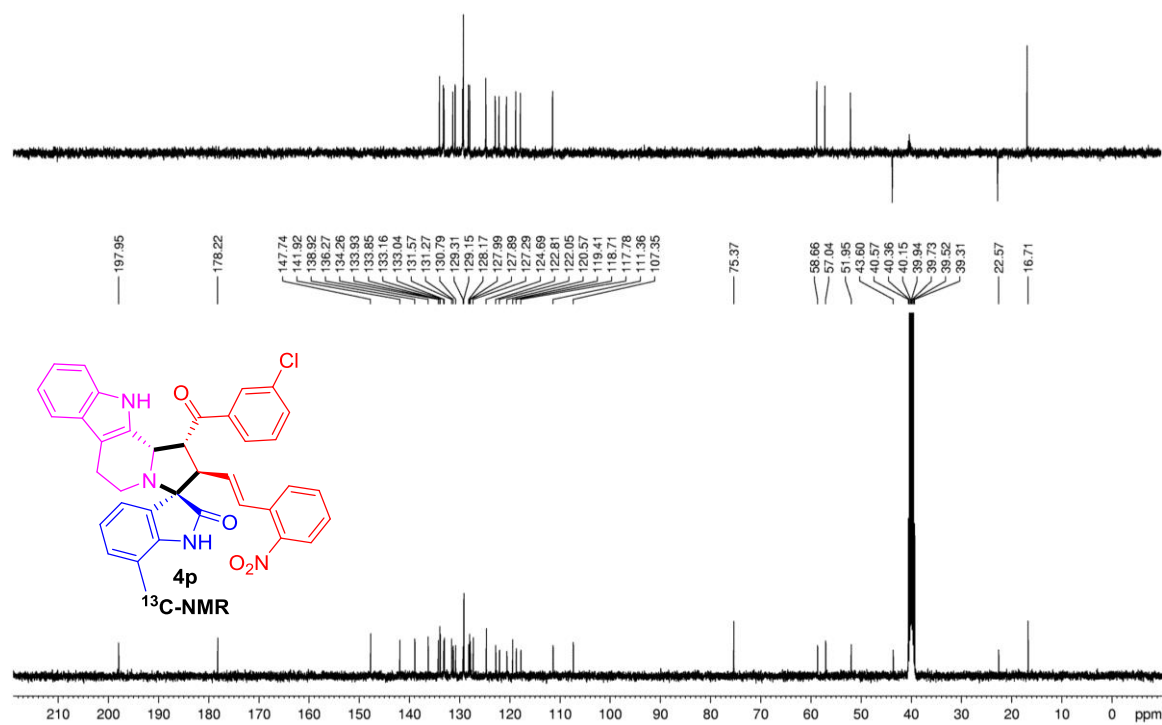

2024-27-H DMSO 20240401-4421

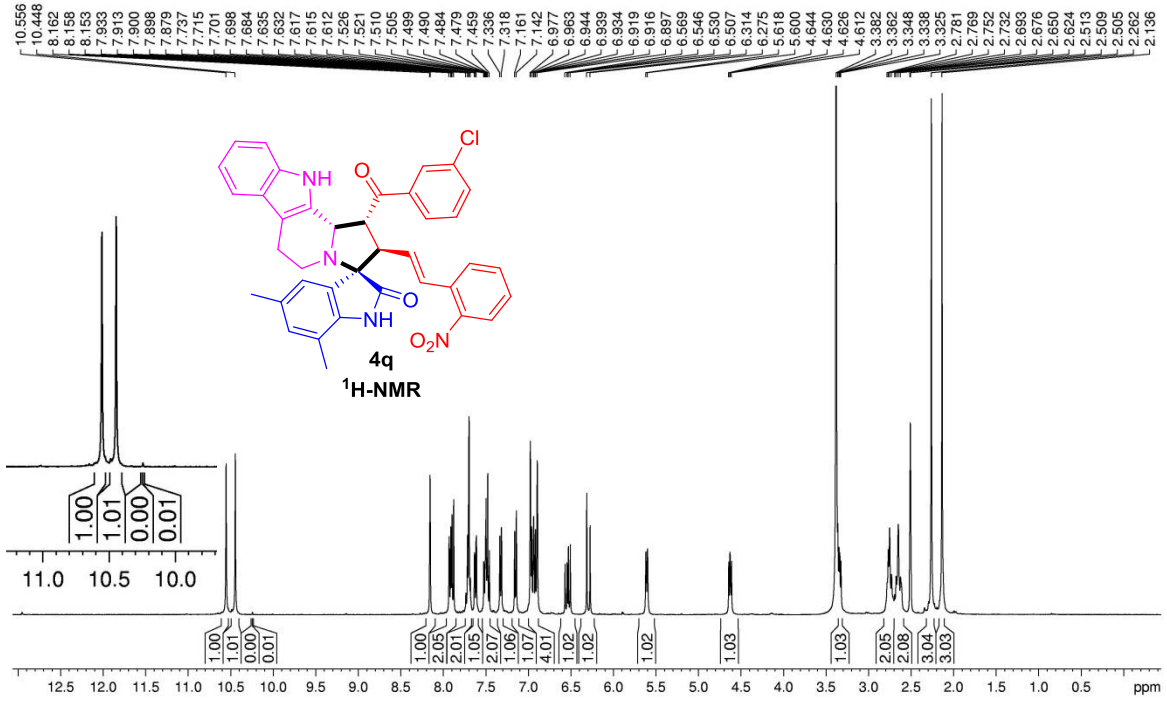

2024-27-C DMSO 20240401-4421

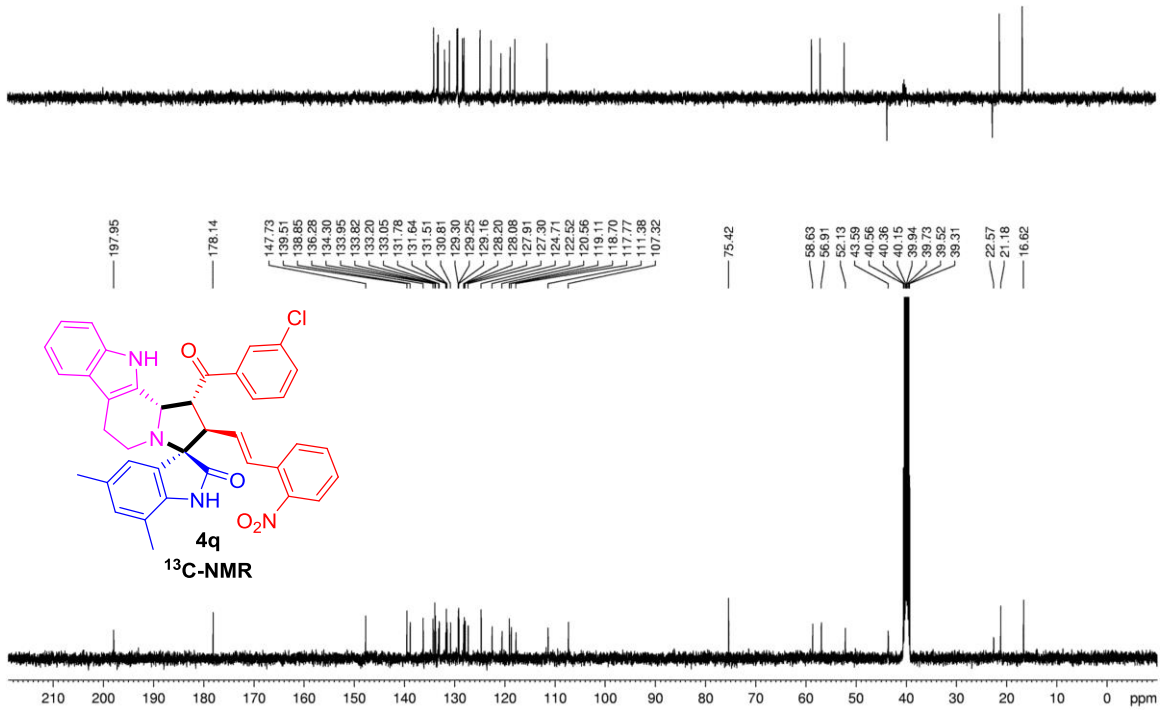

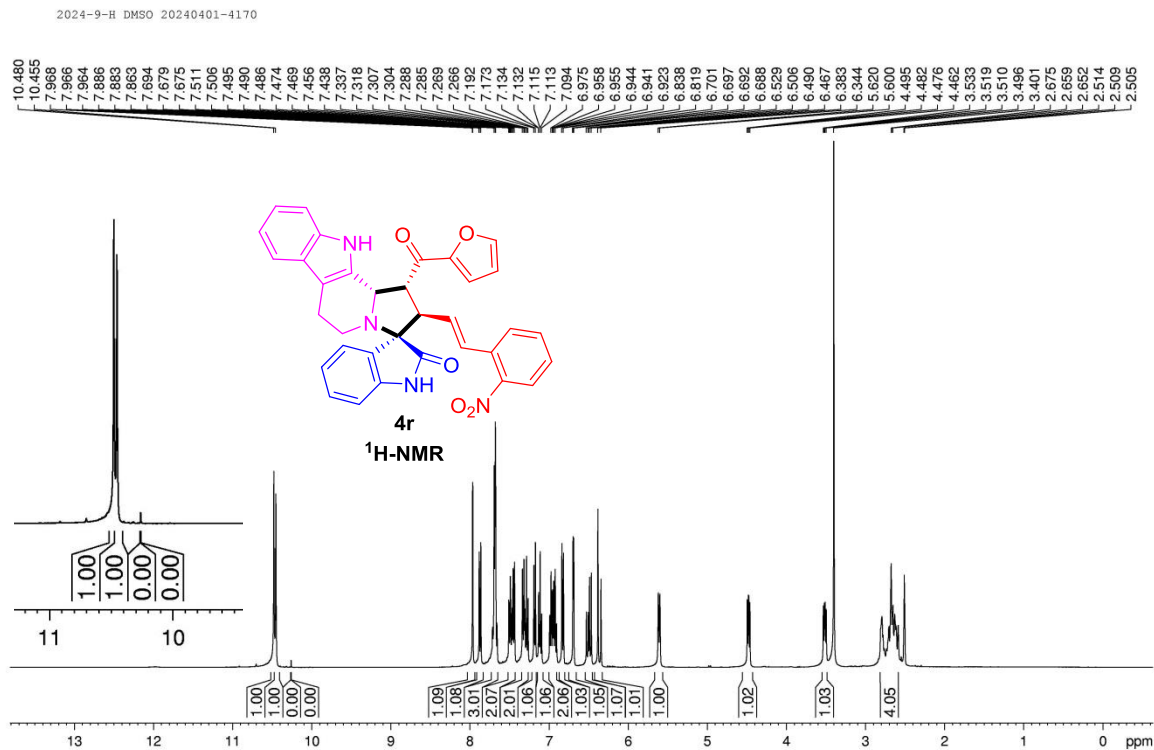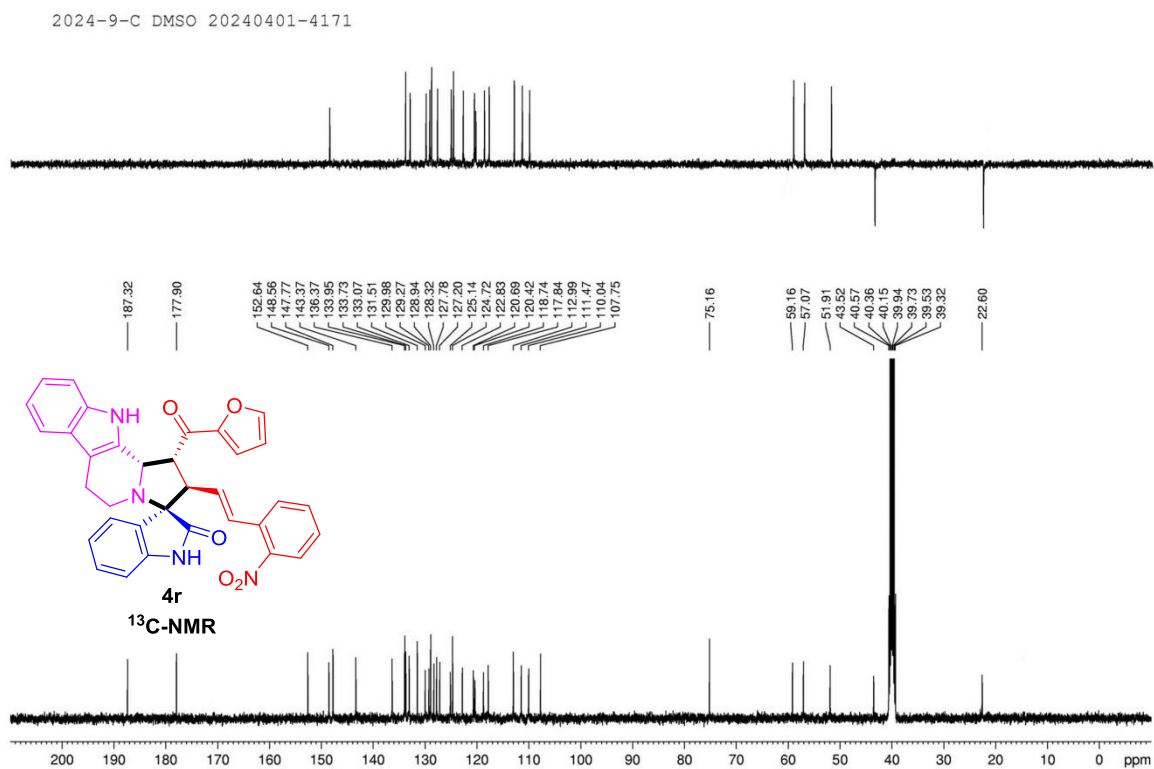



2024-120-H DMSO 202405-23-180

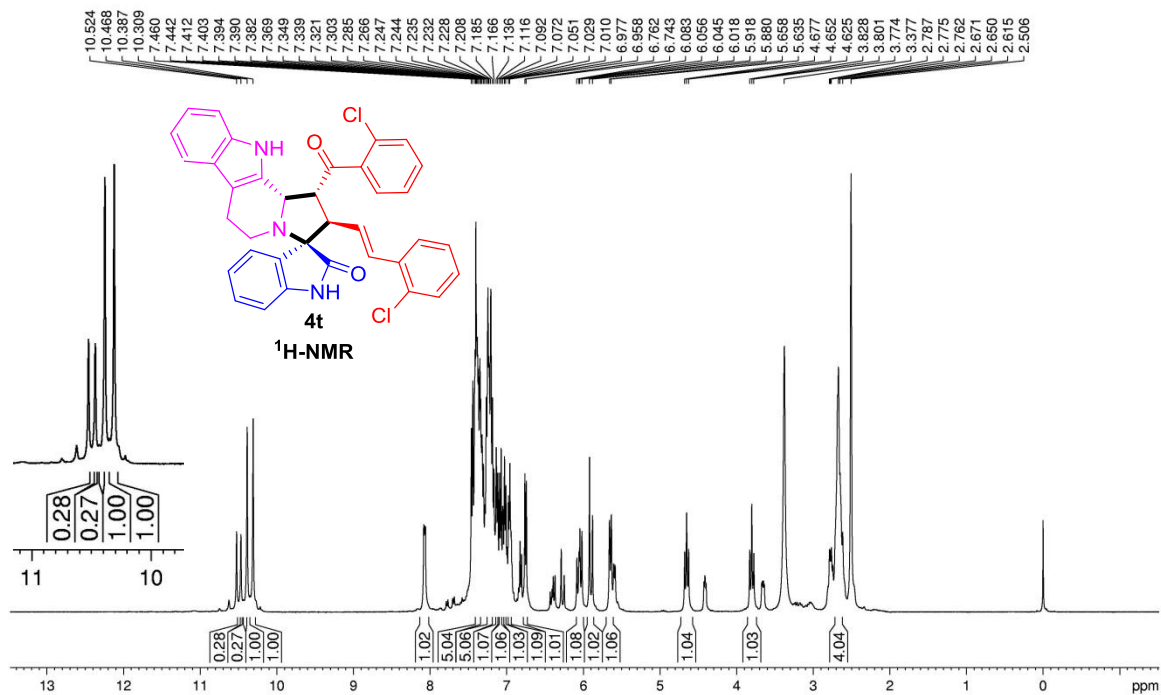

2024-120-C DMSO 202405-23-181

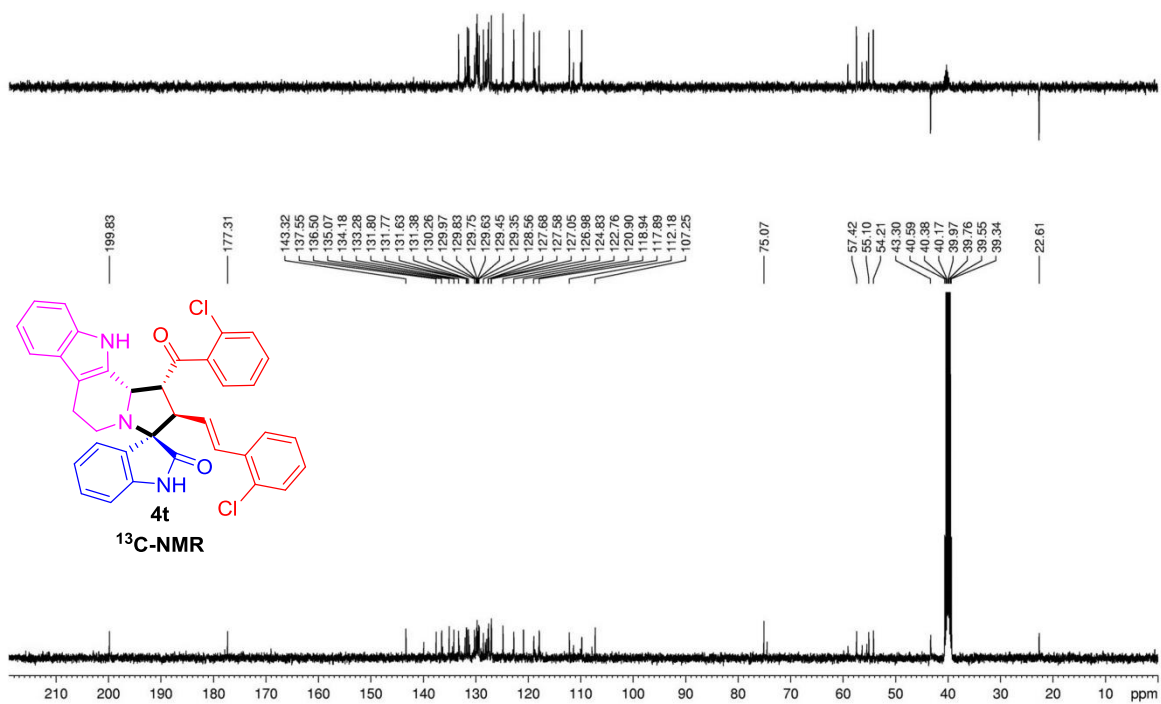

2024-119-H DMSO 202405-23-122

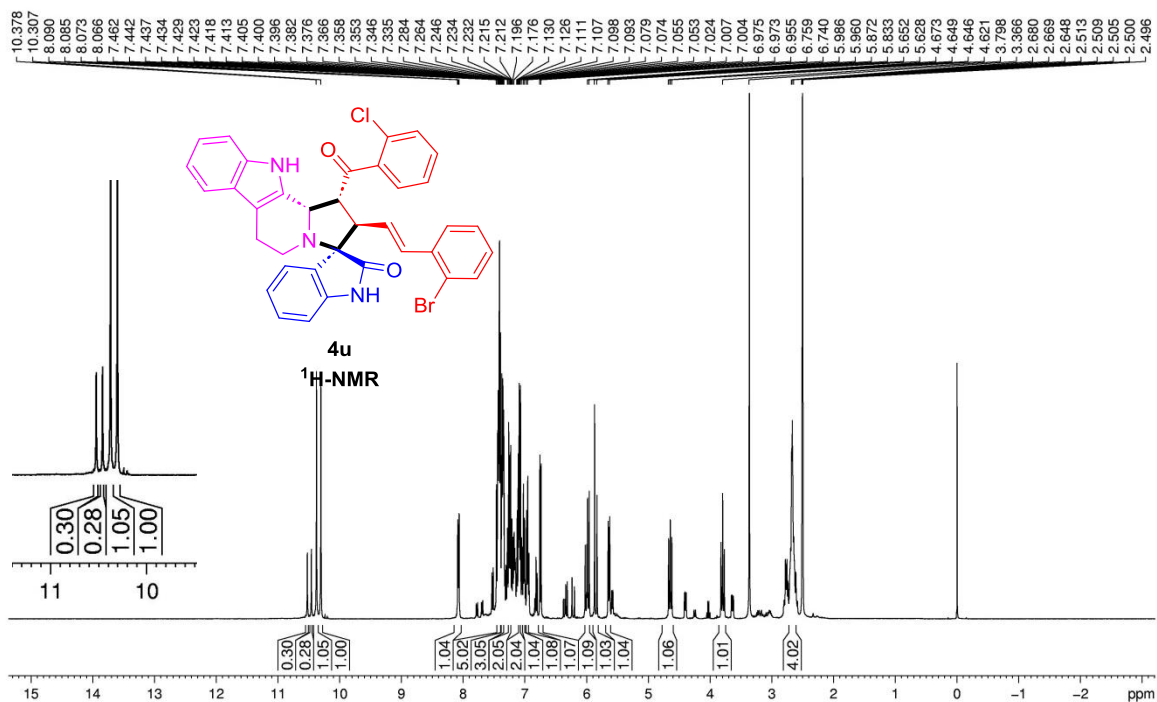

2024-119-C DMSO 202405-23-123

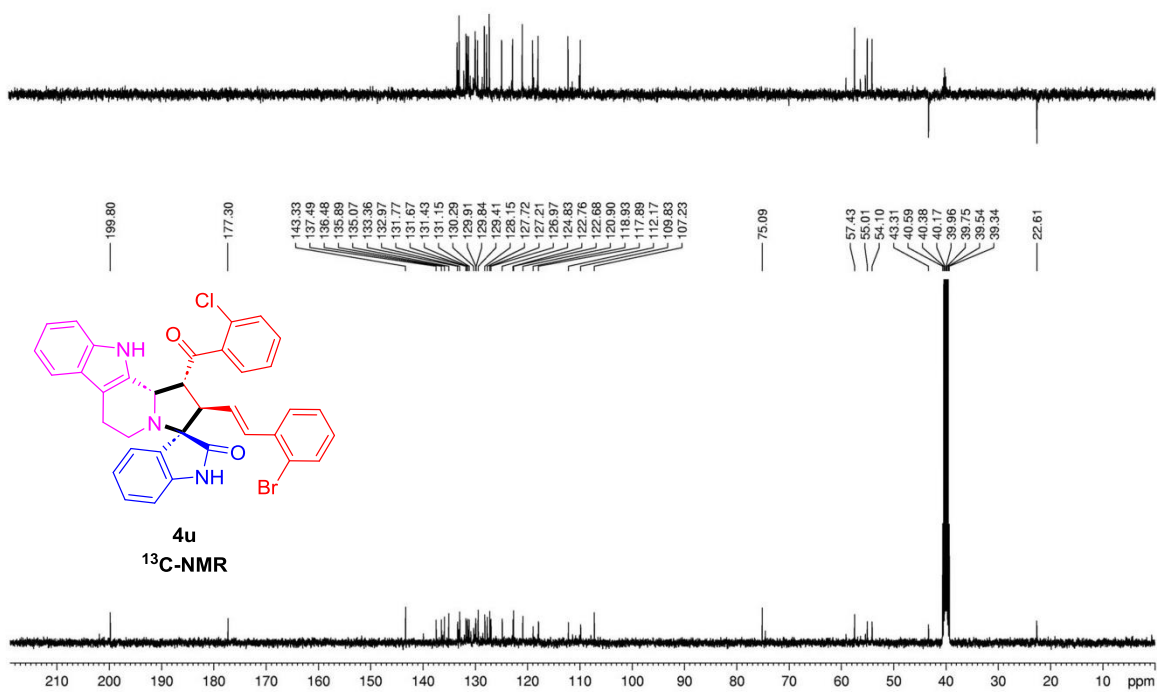

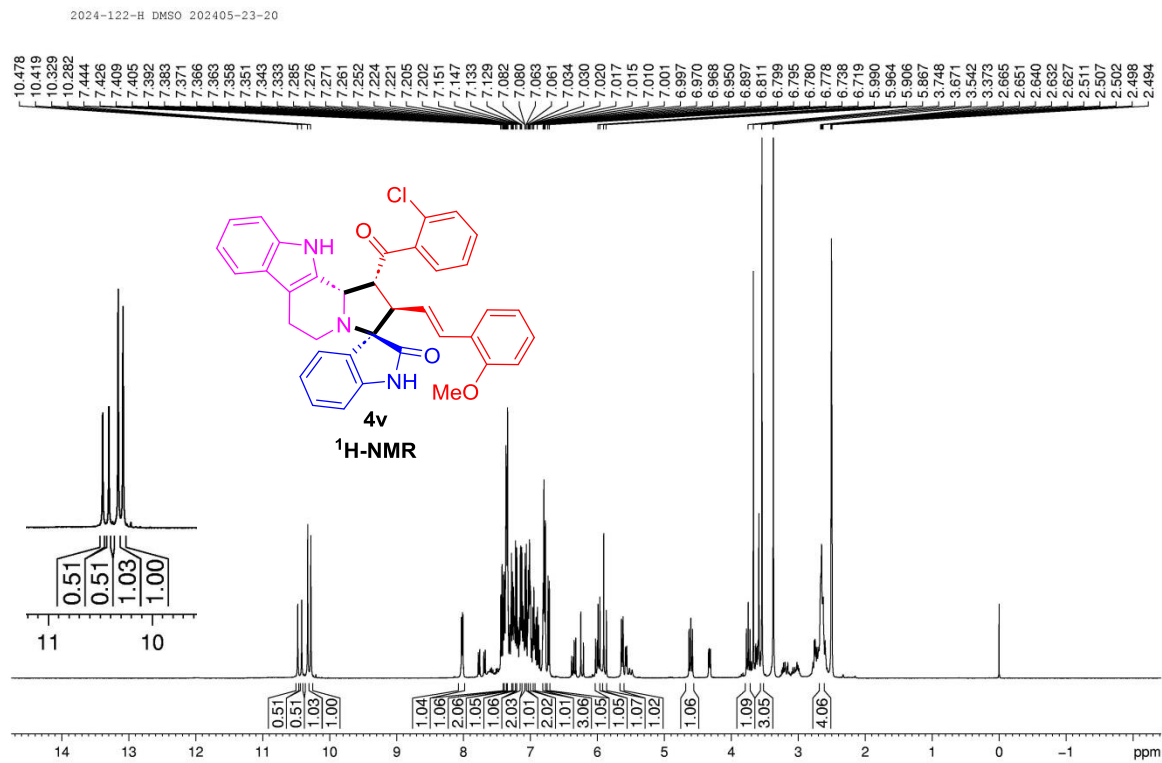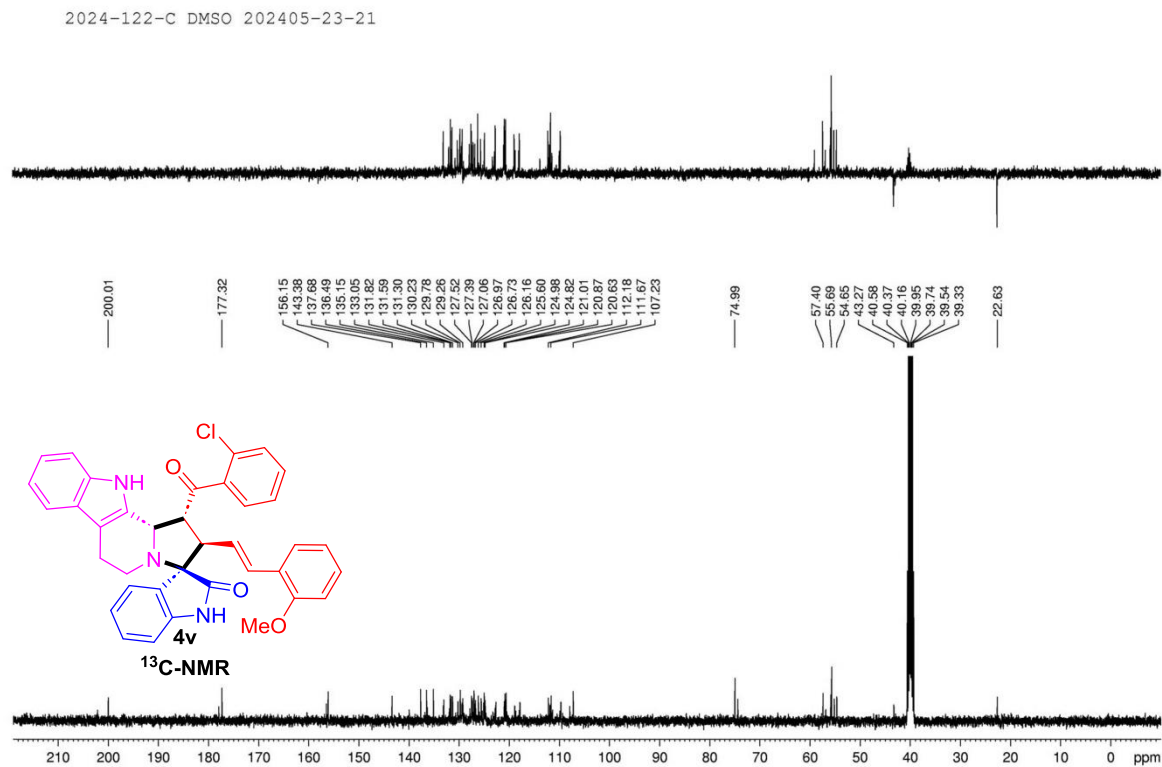



2024-118-H DMSO 202405-23-130

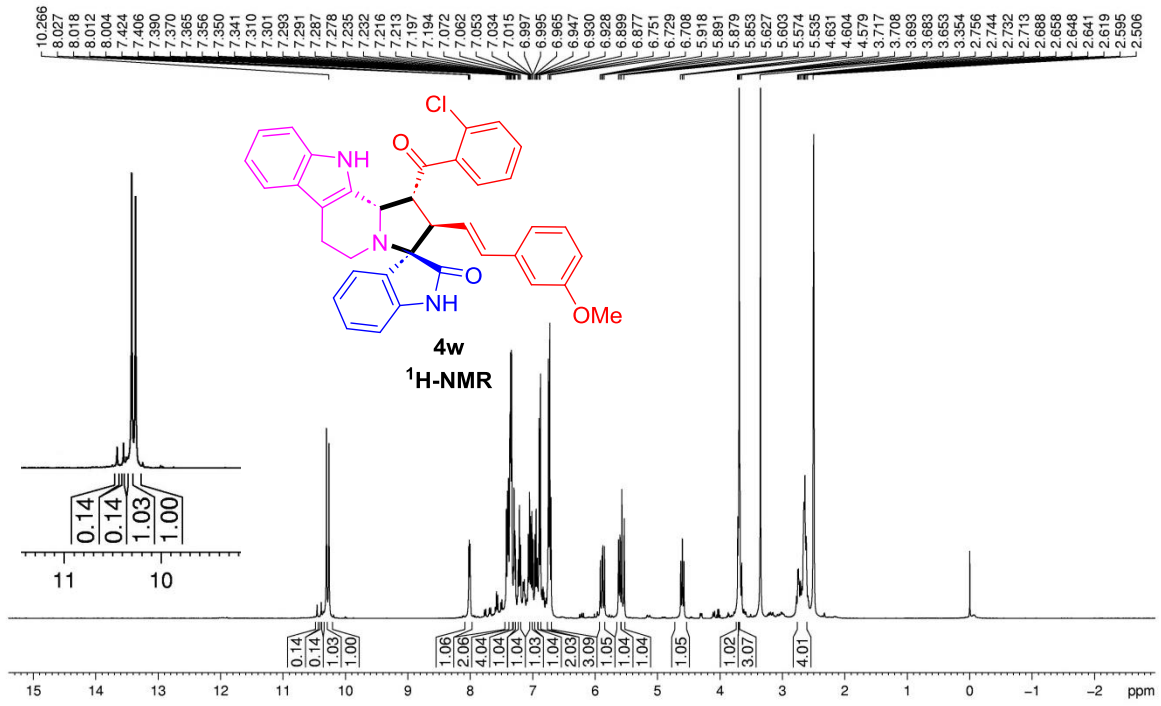

2024-118-C DMSO 202405-23-131

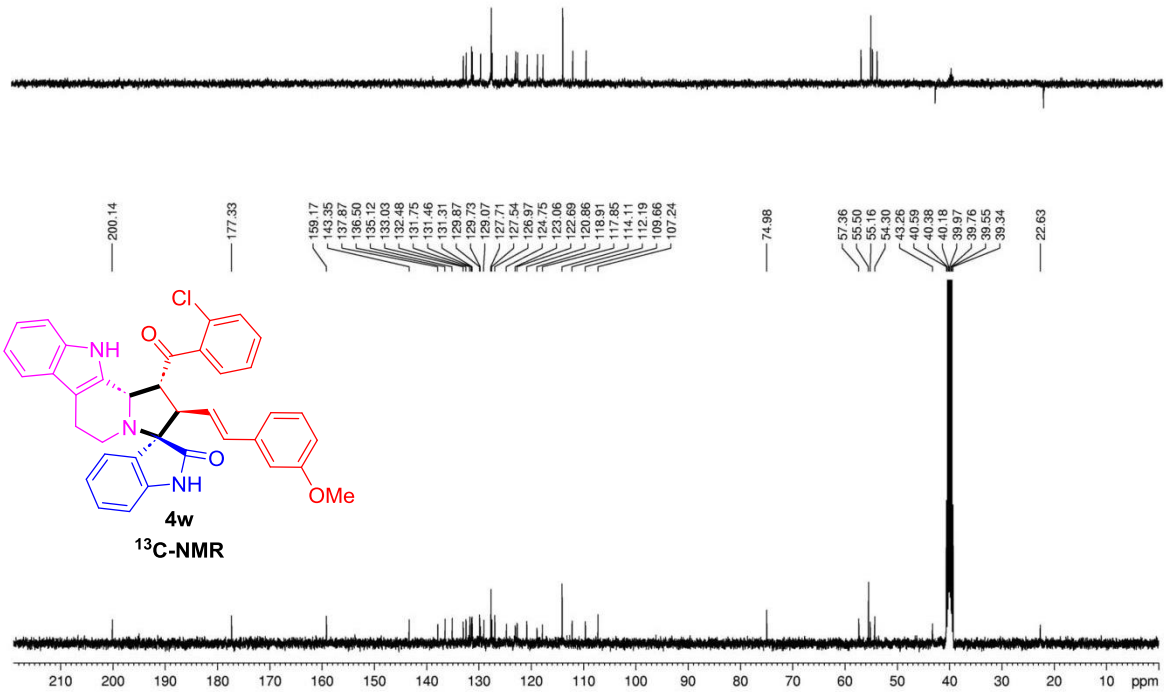

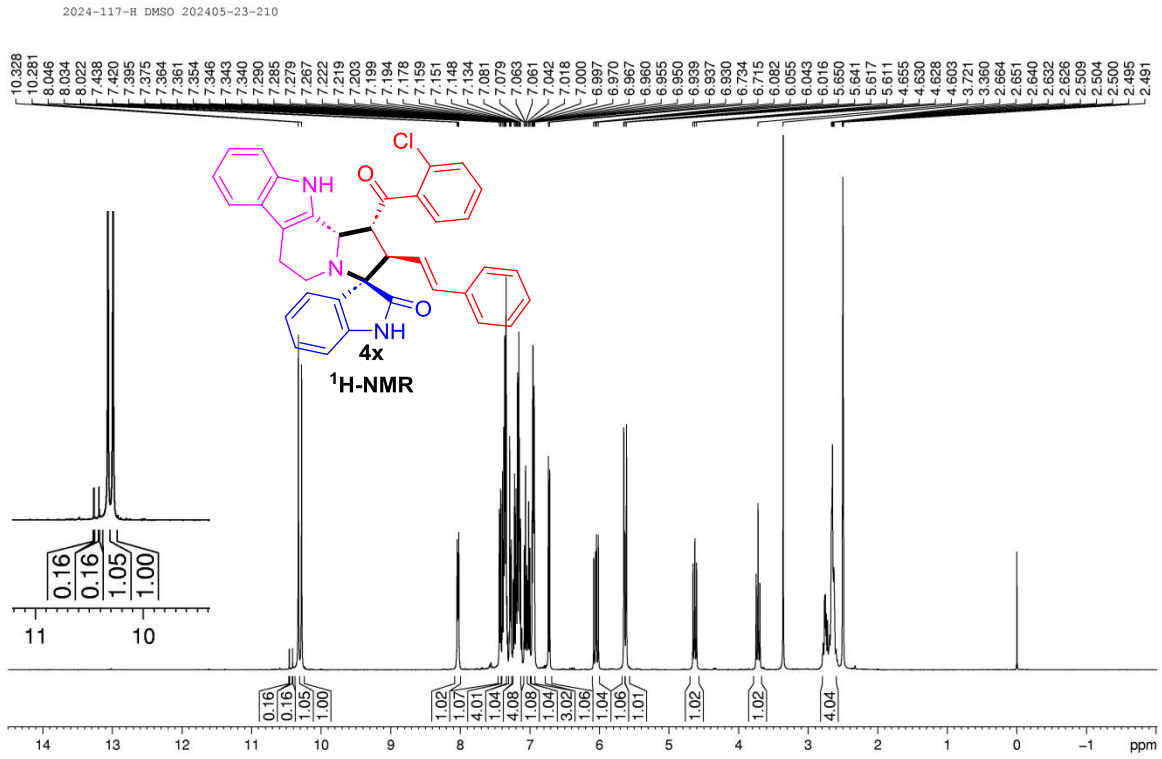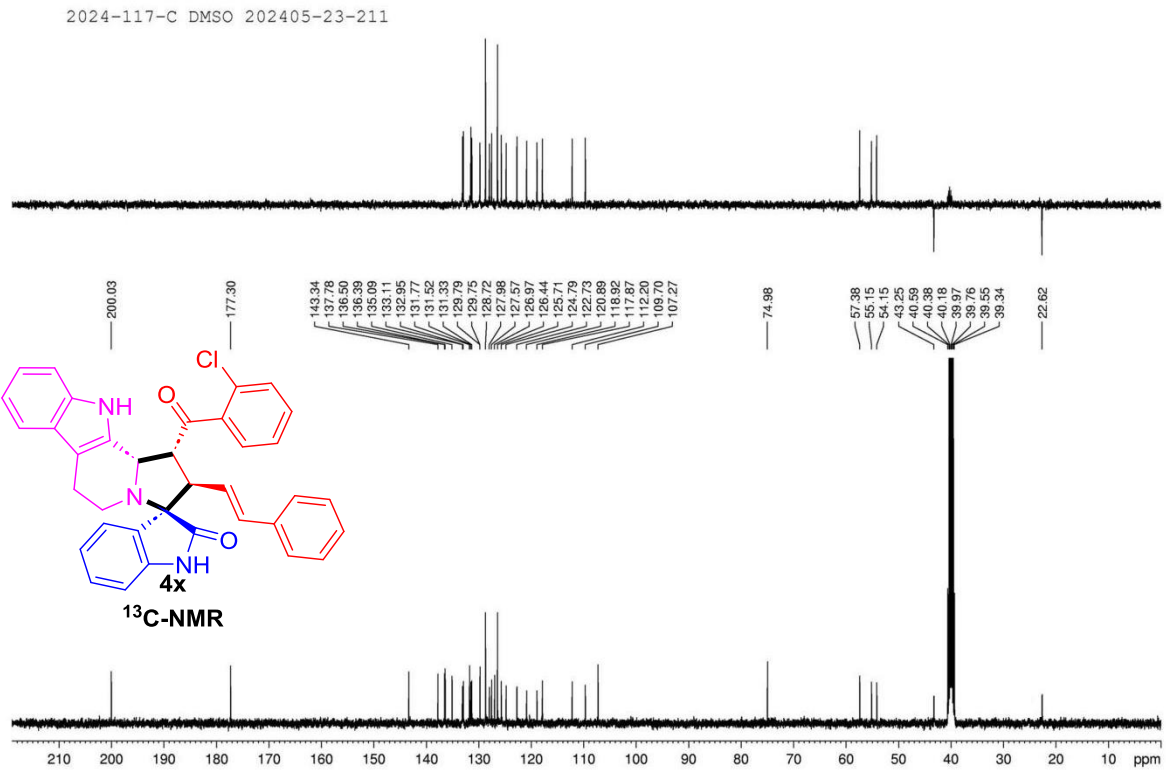



2024-123-H DMSO 202405-23-90

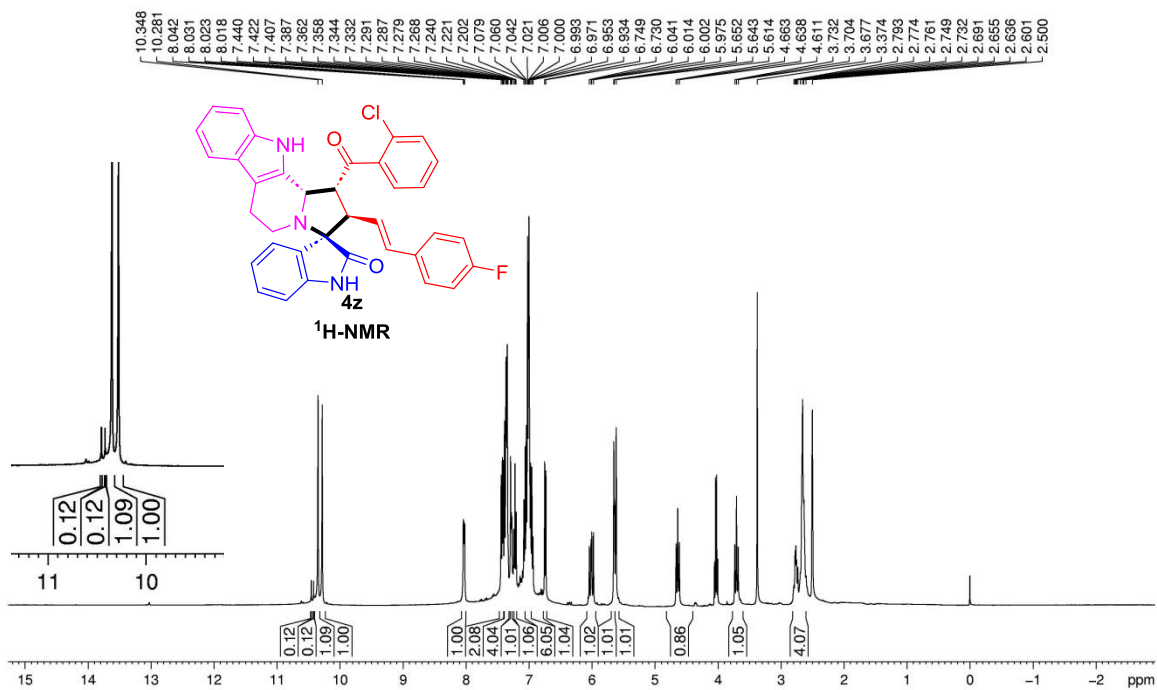

2024-123-C DMSO 202405-23-91

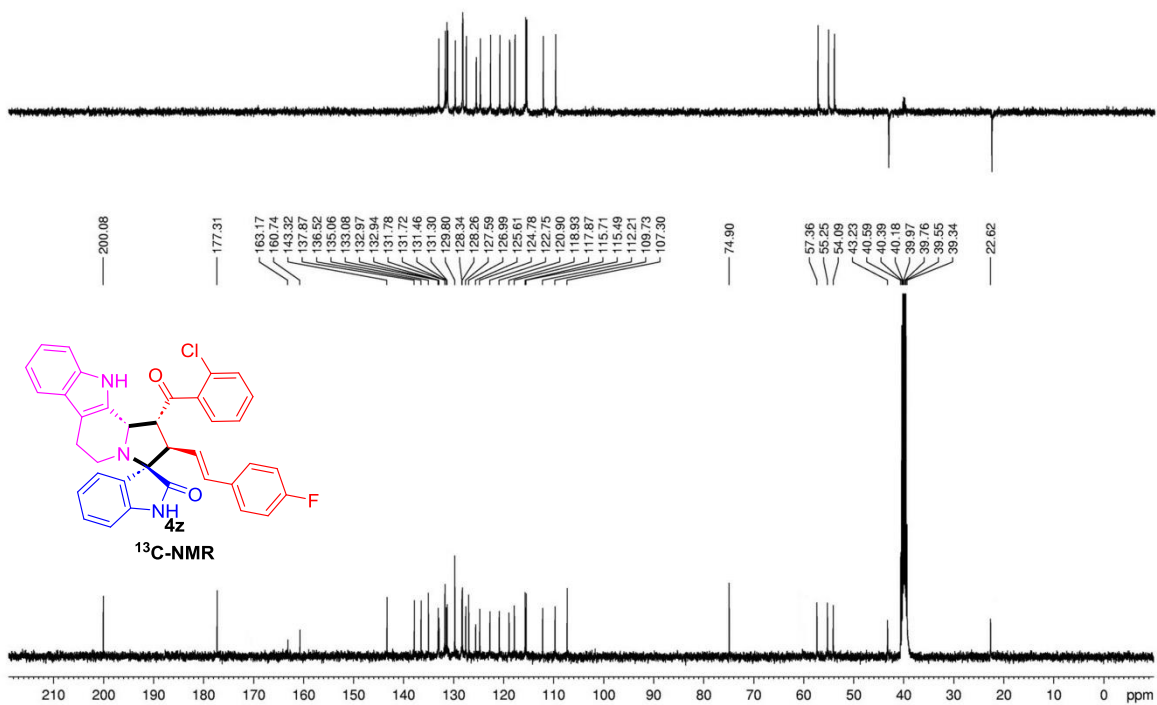

2024-114-H DMSO 202405-23-190

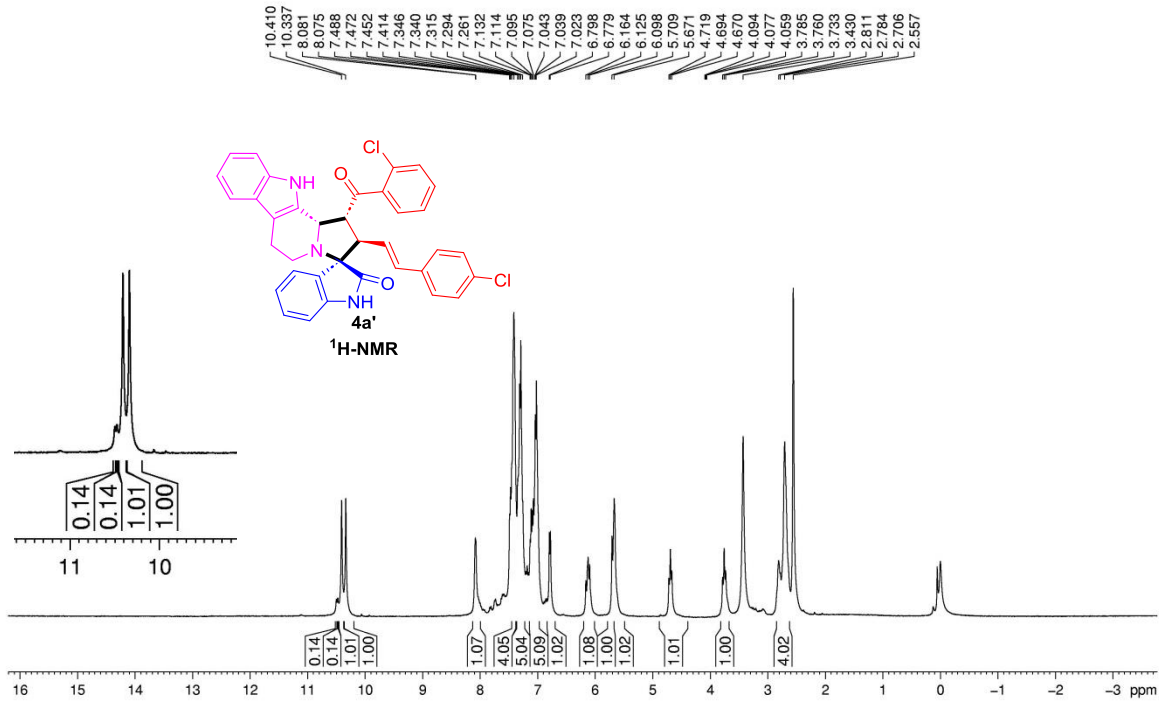

2024-114-C DMSO 202405-23-191

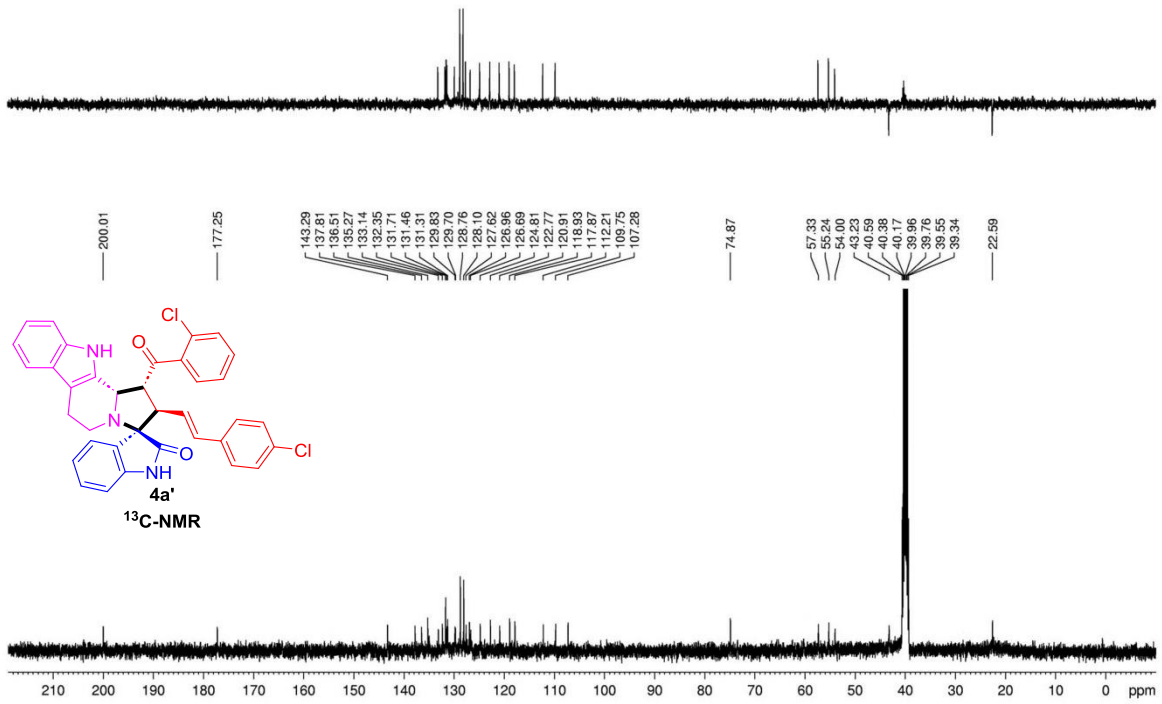

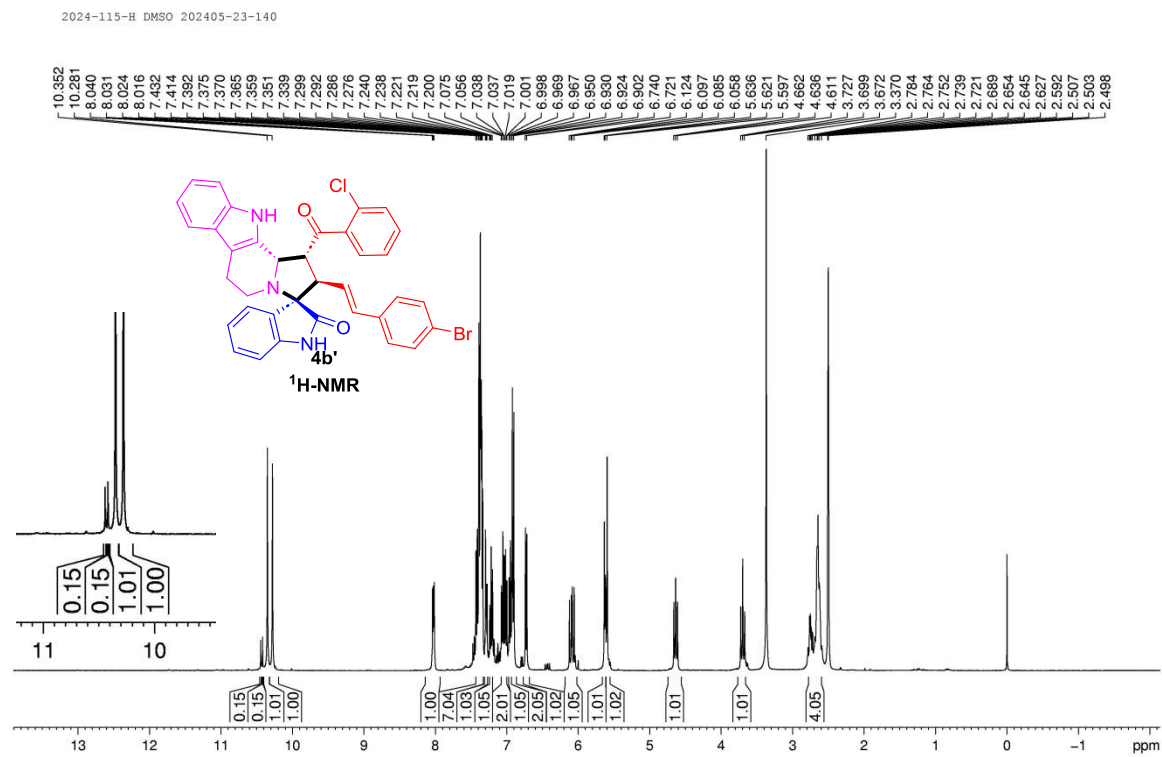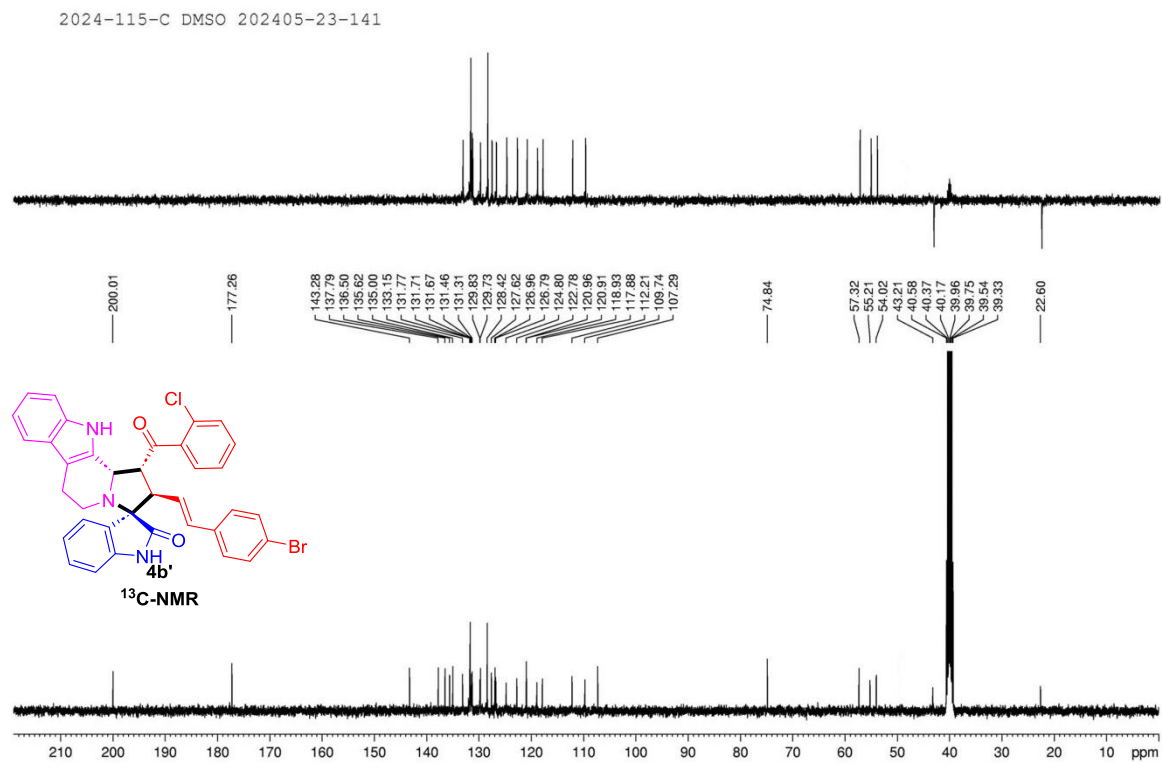

2024-121-H DMSO 202405-23-30

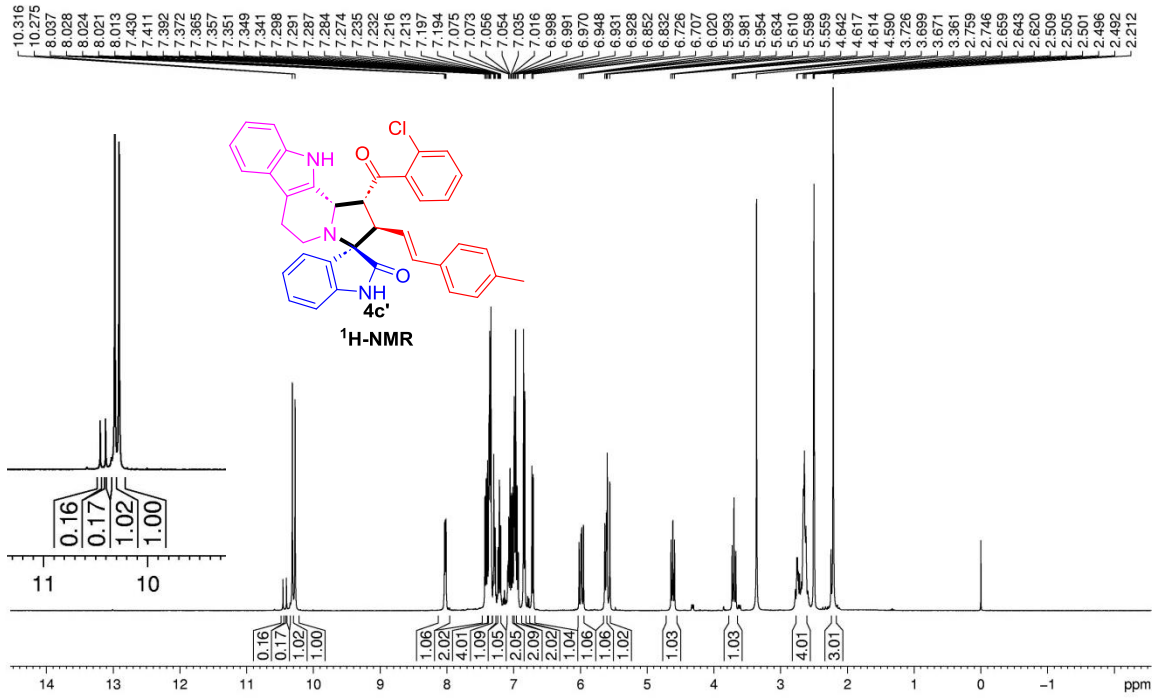

2024-121-C DMSO 202405-23-31

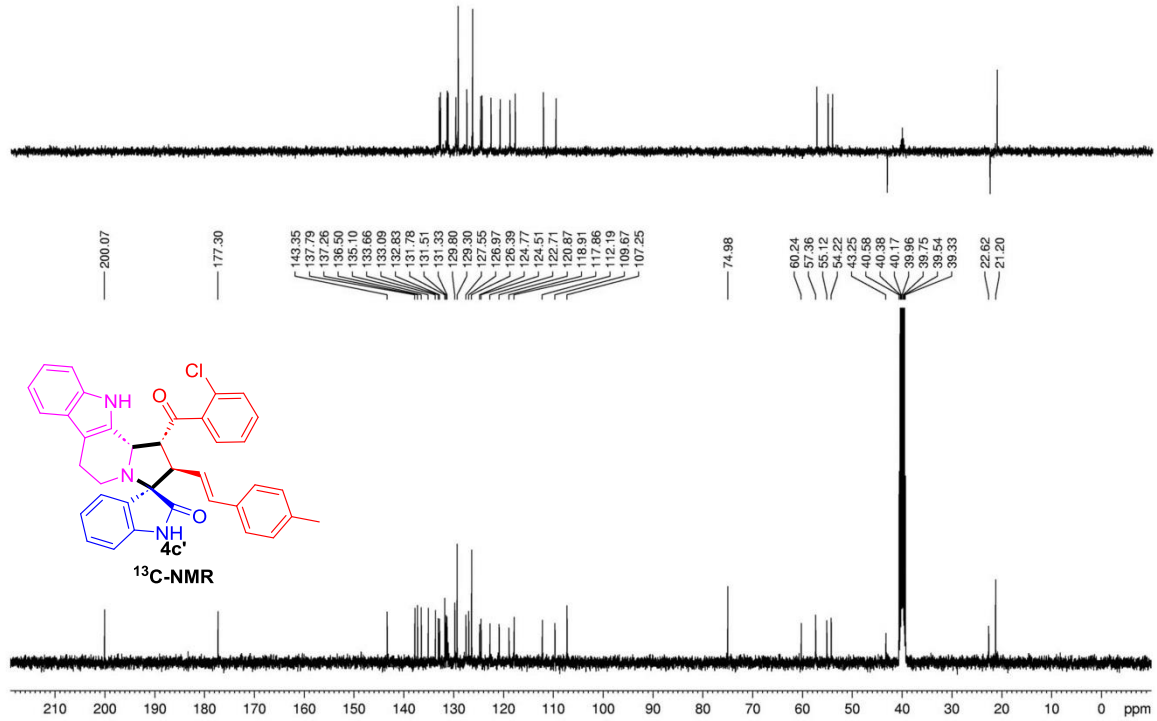

2024-16-H DMSO 20240401-4340

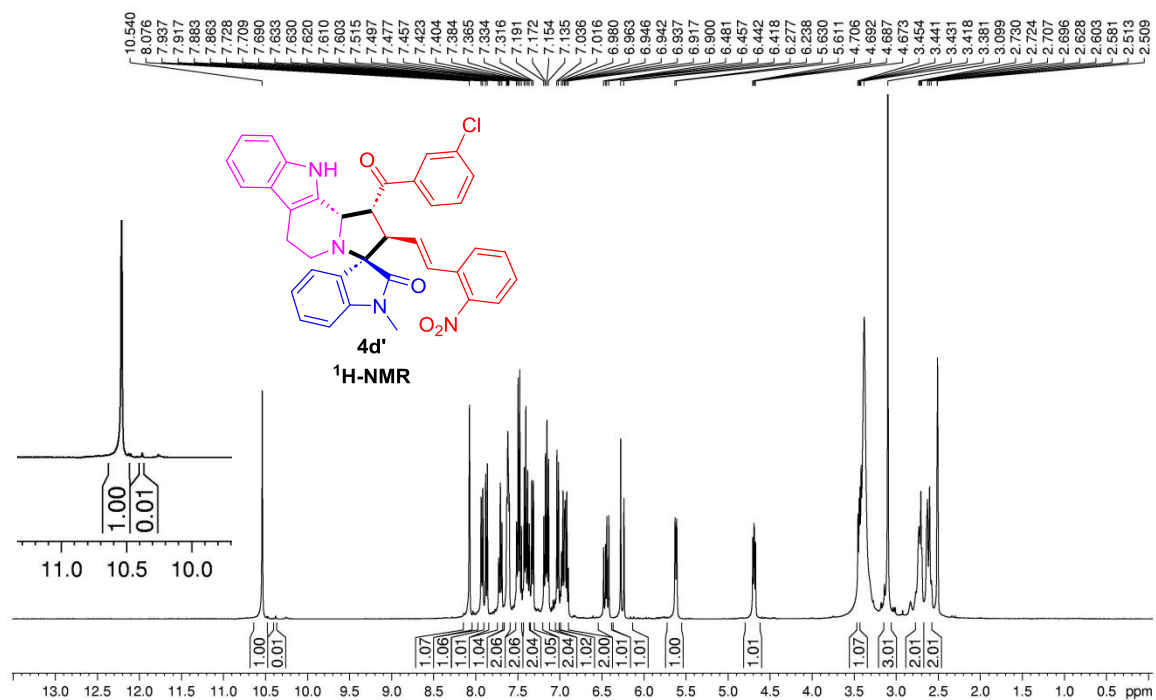

2024-16-C DMSO 20240401-4341

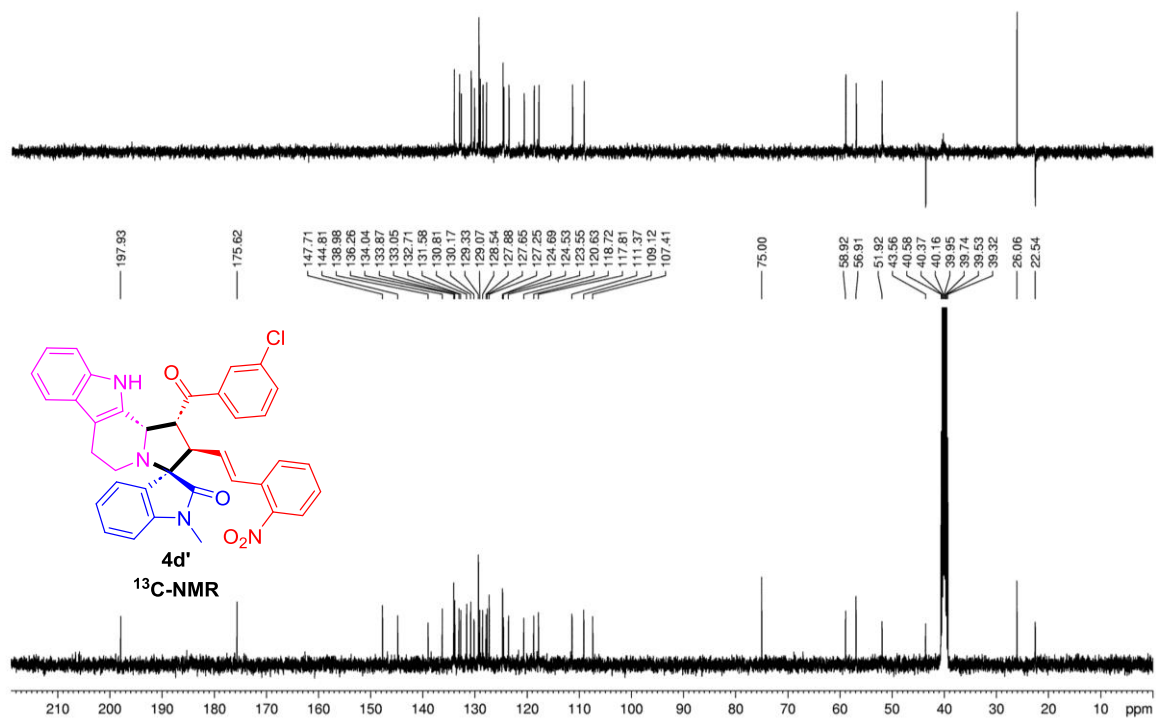



## 2. $^1\text{H}$ and $^{13}\text{C}$ NMR spectra for compounds 5

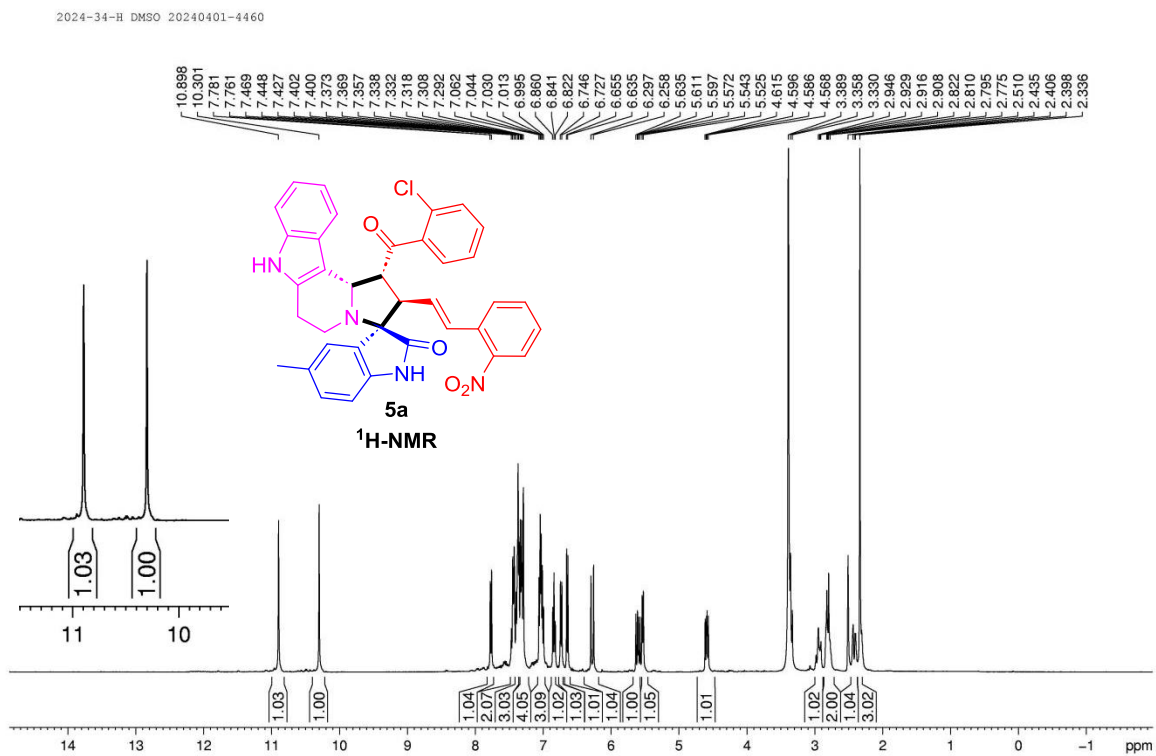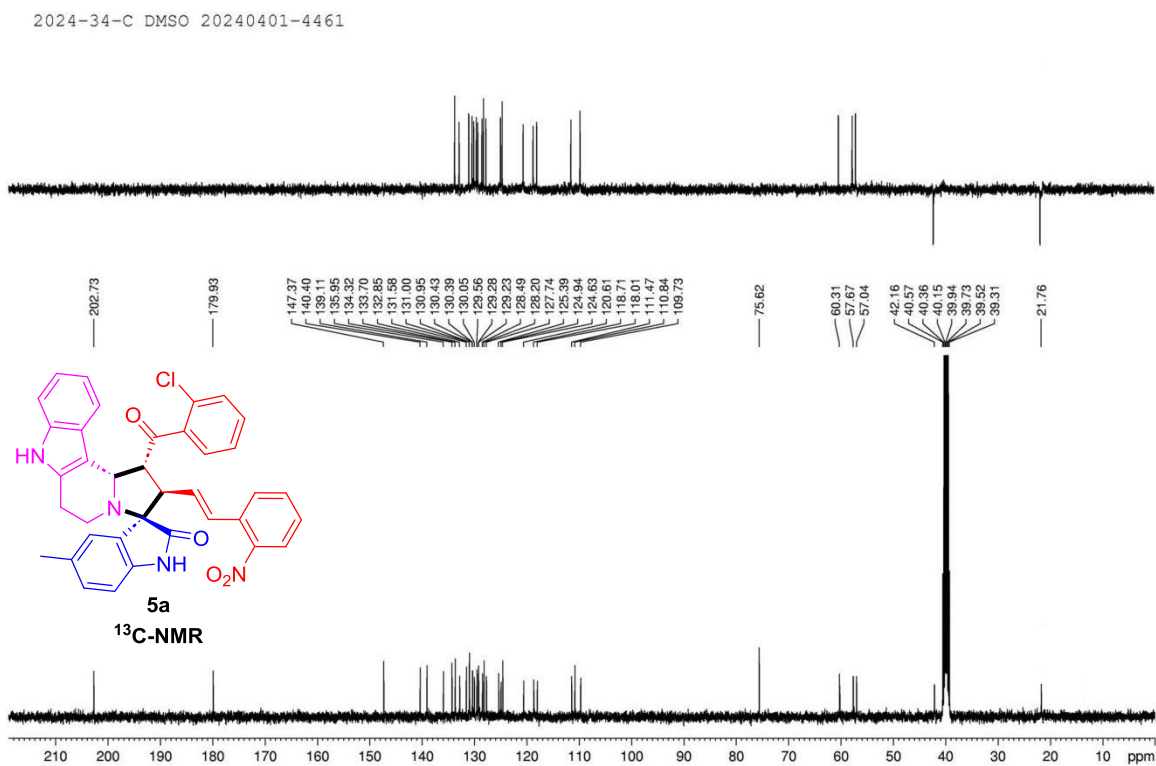



2024-32-B DMSO 20240401-4350

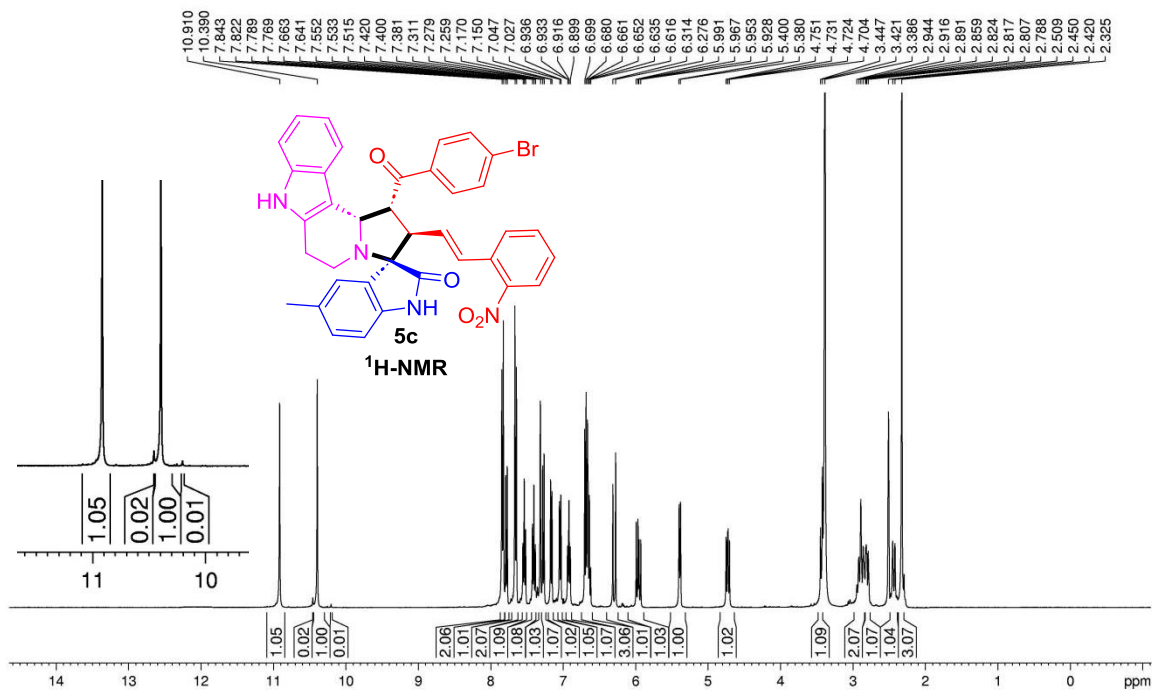

2024-32-C DMSO 20240401-4351

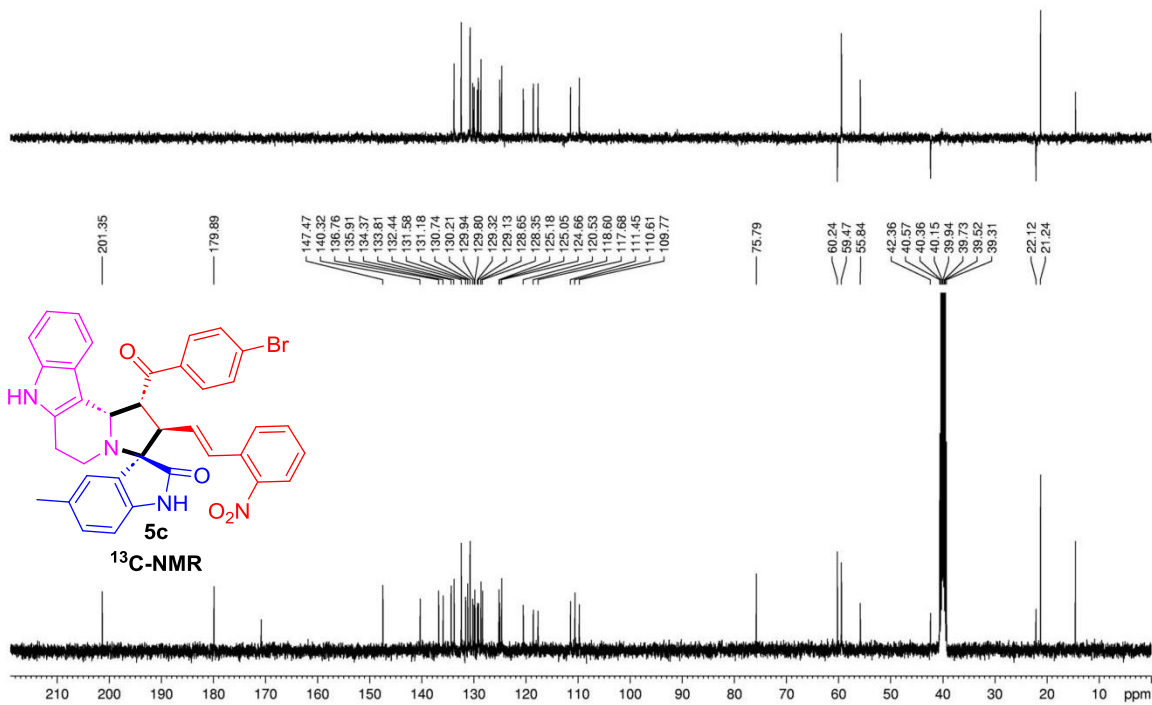

2024-33-H DMSO 20240401-4370

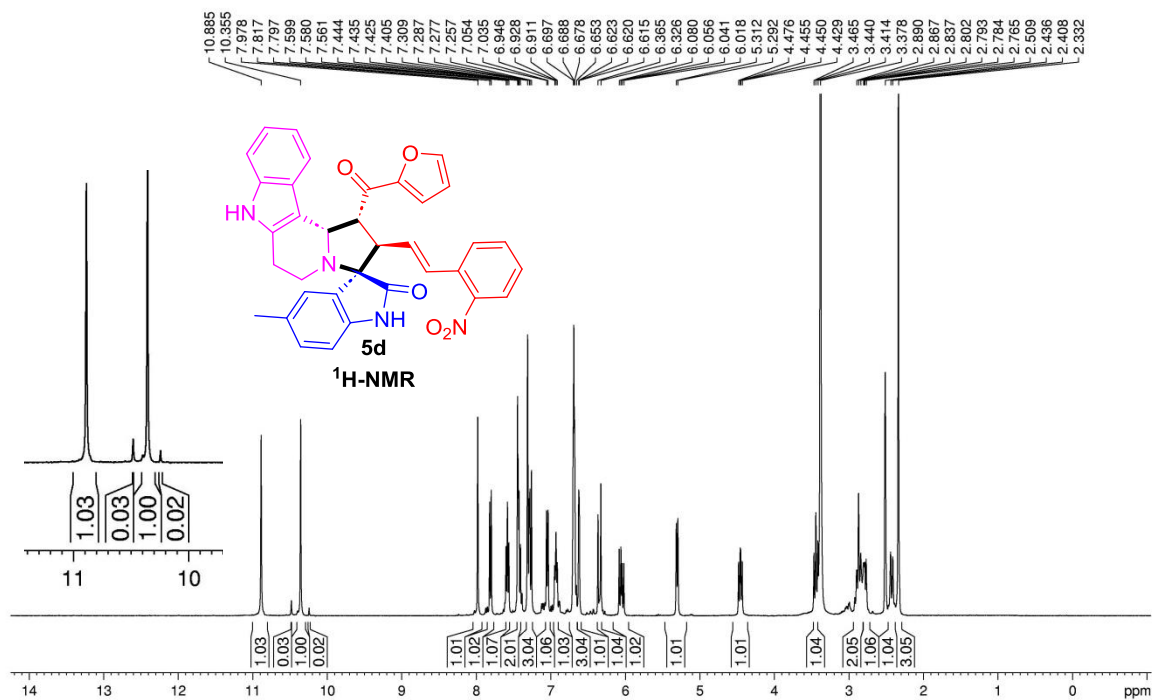

2024-33-C DMSO 20240401-4371

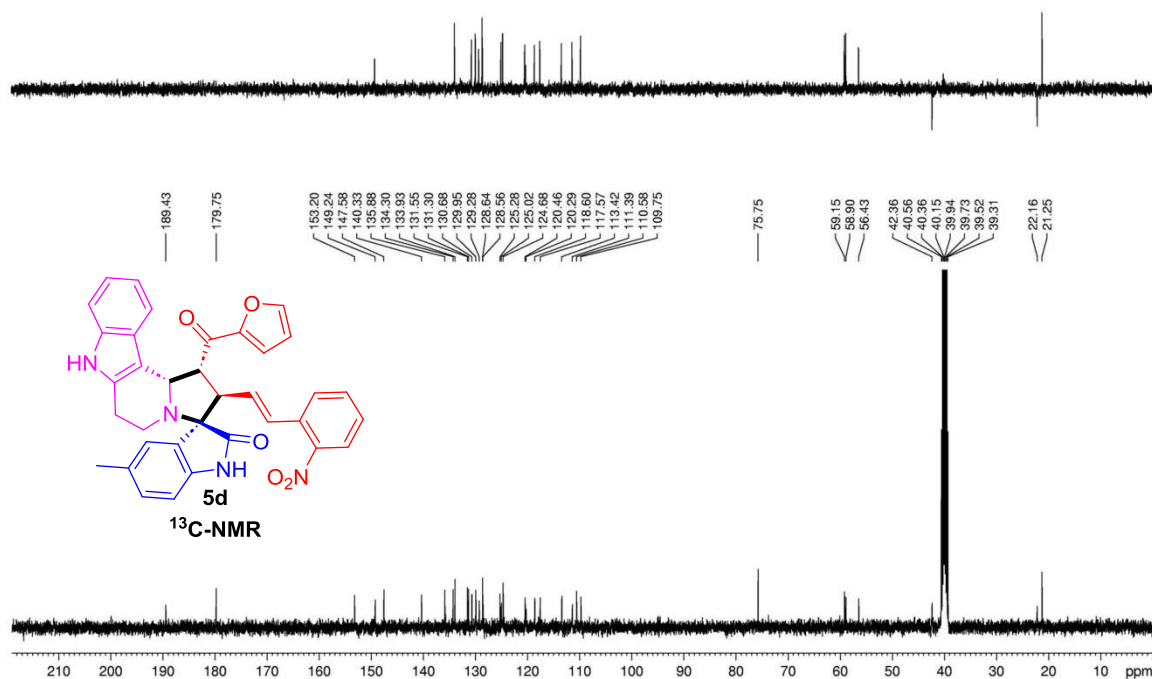

2024-29-H DMSO 20240401-4430

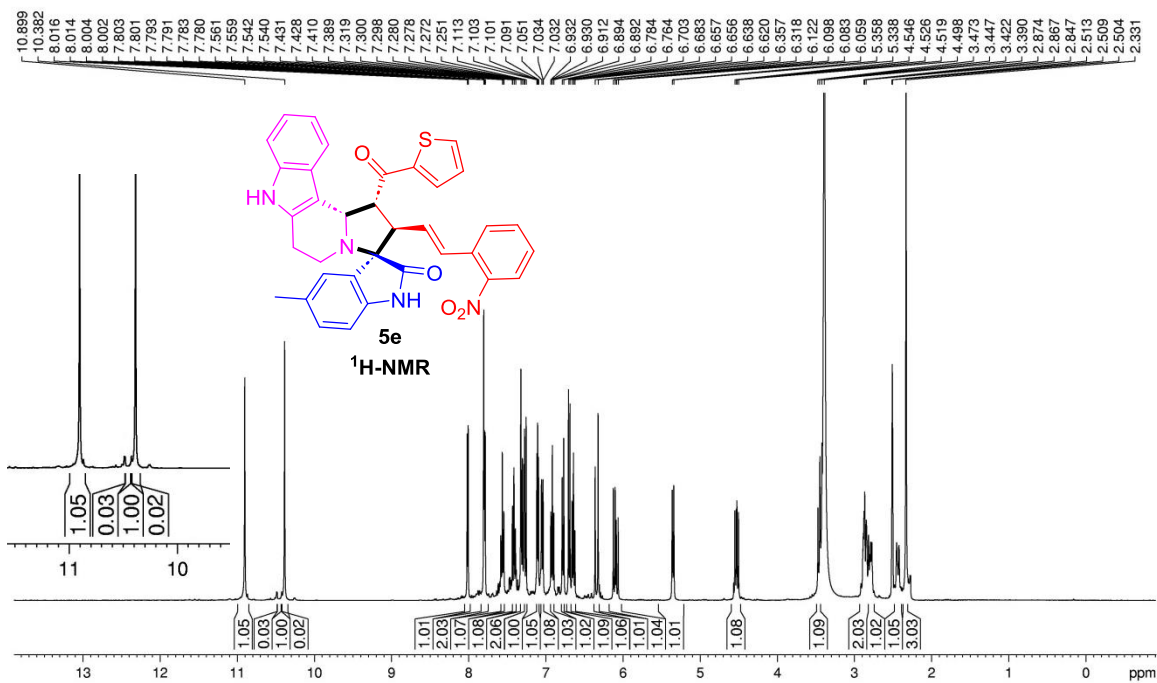

2024-29-C DMSO 20240401-4431

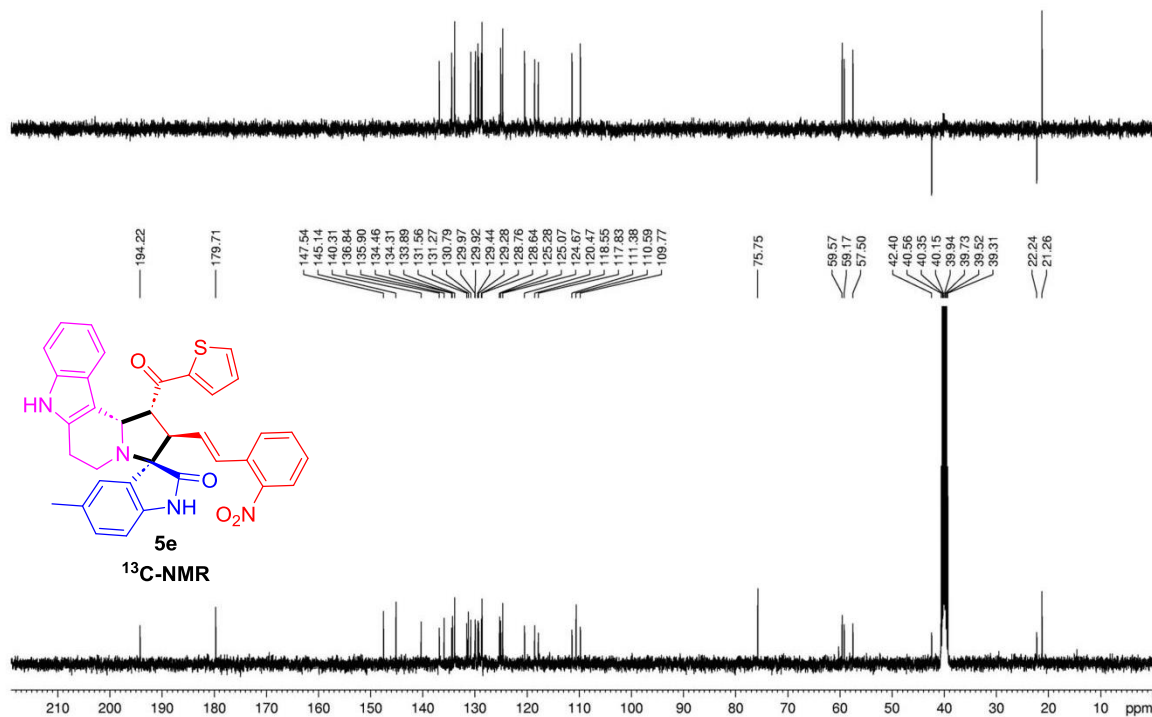

2024-36-H DMSO 20240401-4450

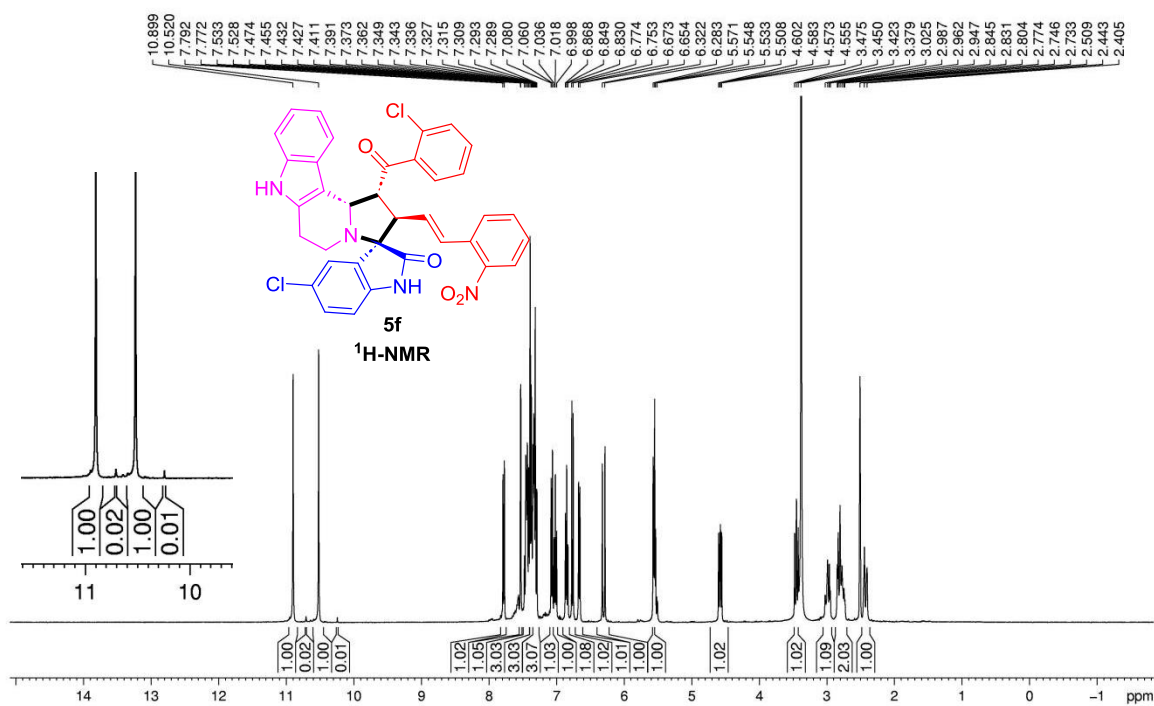

2024-36-H DMSO 20240401-4451

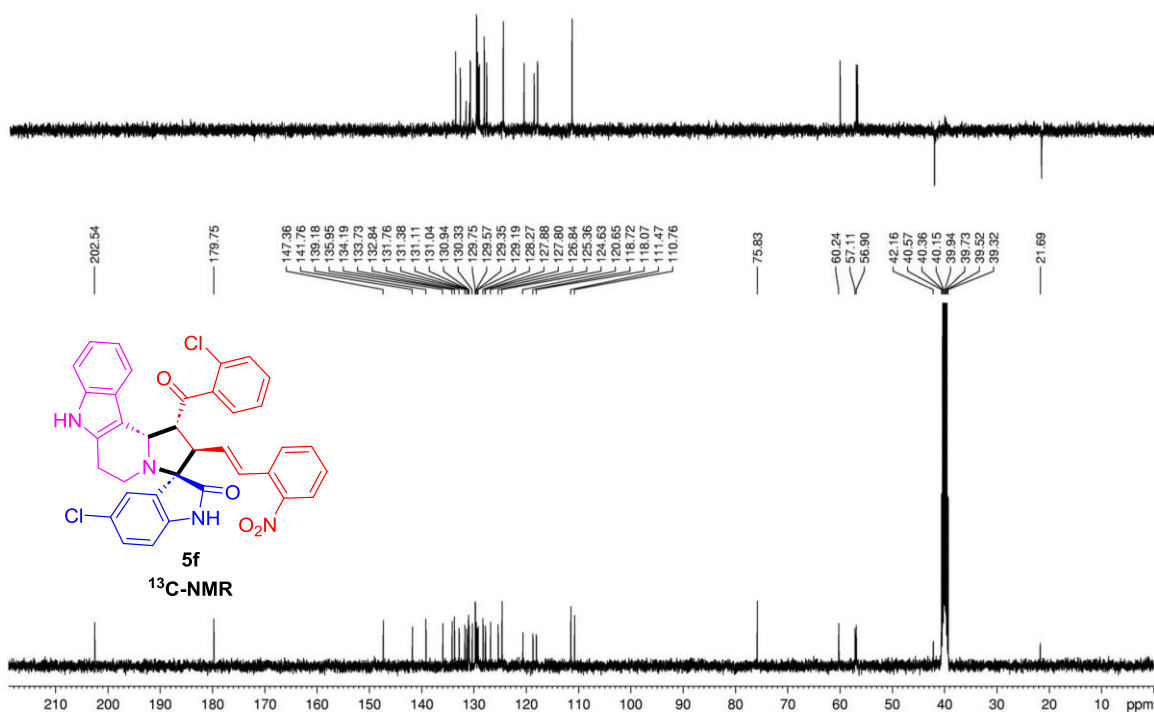

2024-38-H DMSO 20240401-4440

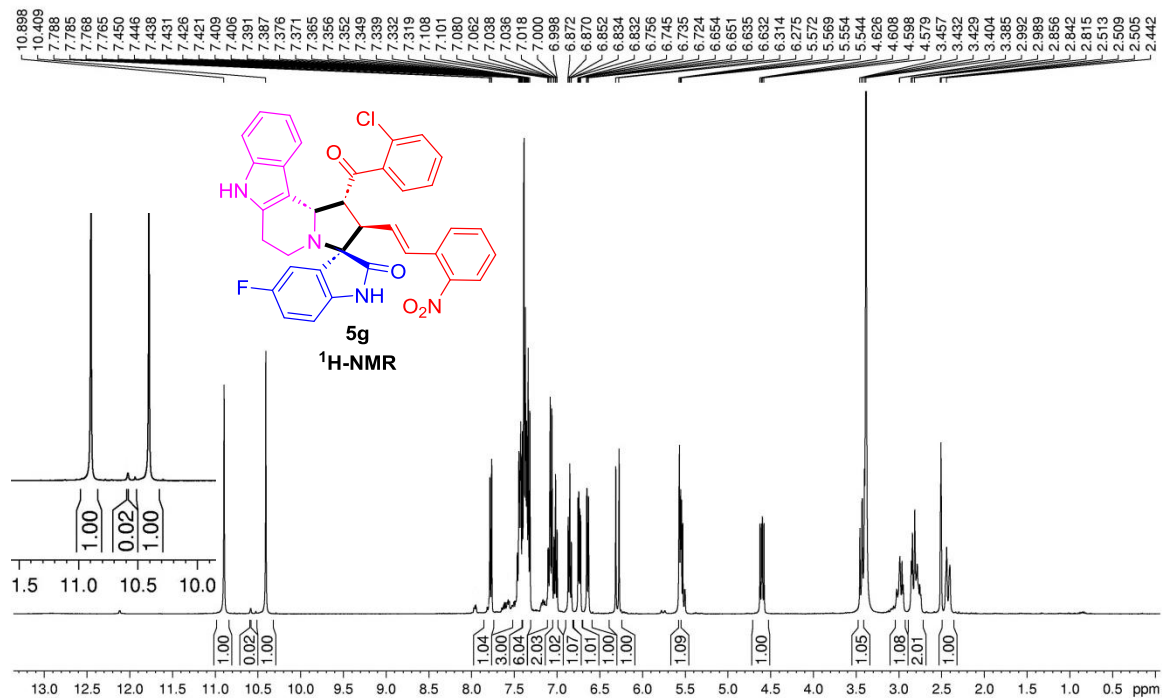

2024-38-C DMSO 20240401-4441

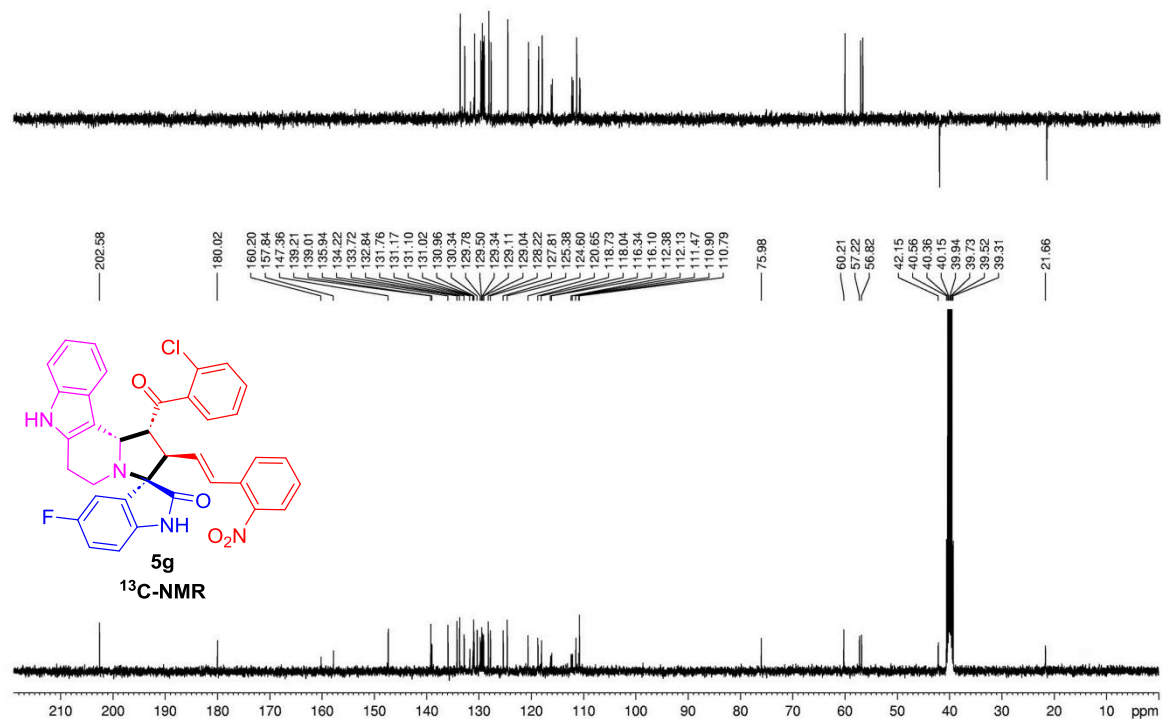

2024-37-H DMSO 20240401-4480

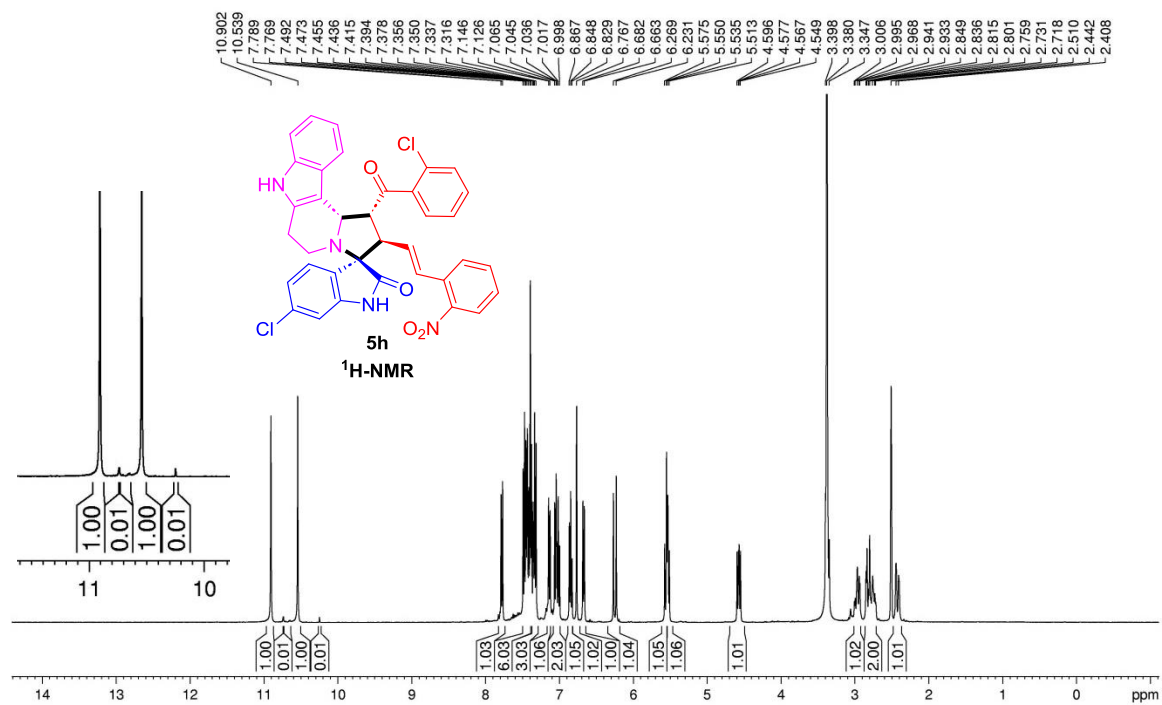

2024-37-C DMSO 20240401-4481

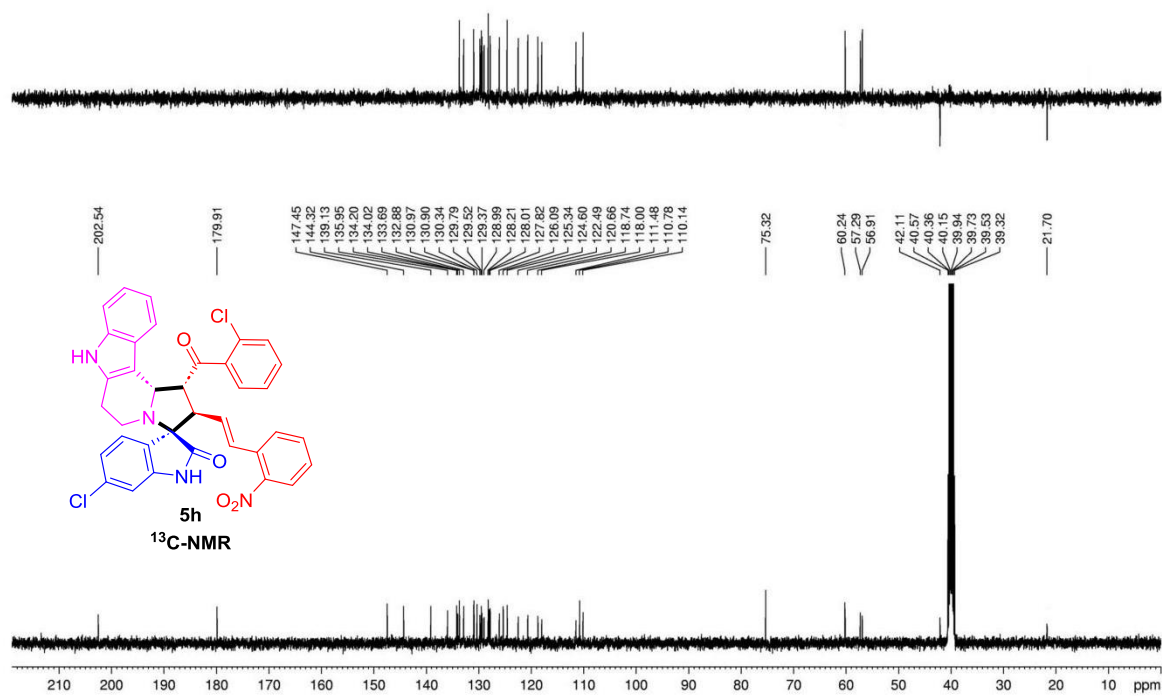



2024-35-R DMSO 20240401-4500

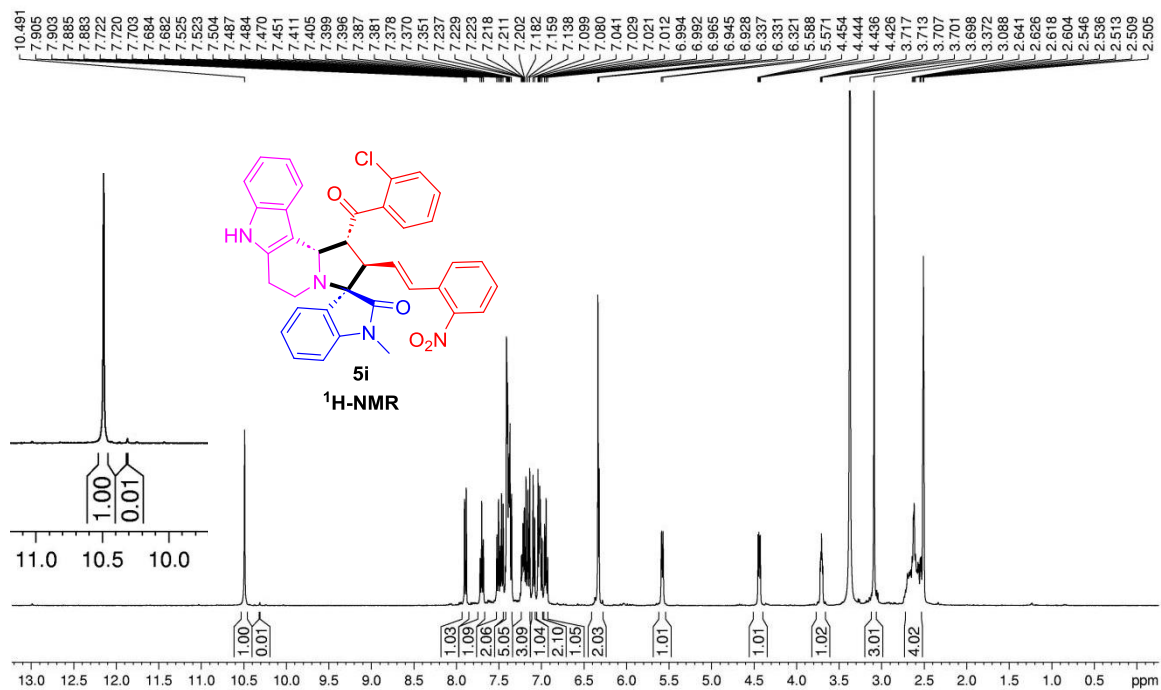

2024-35-C DMSO 20240401-4501

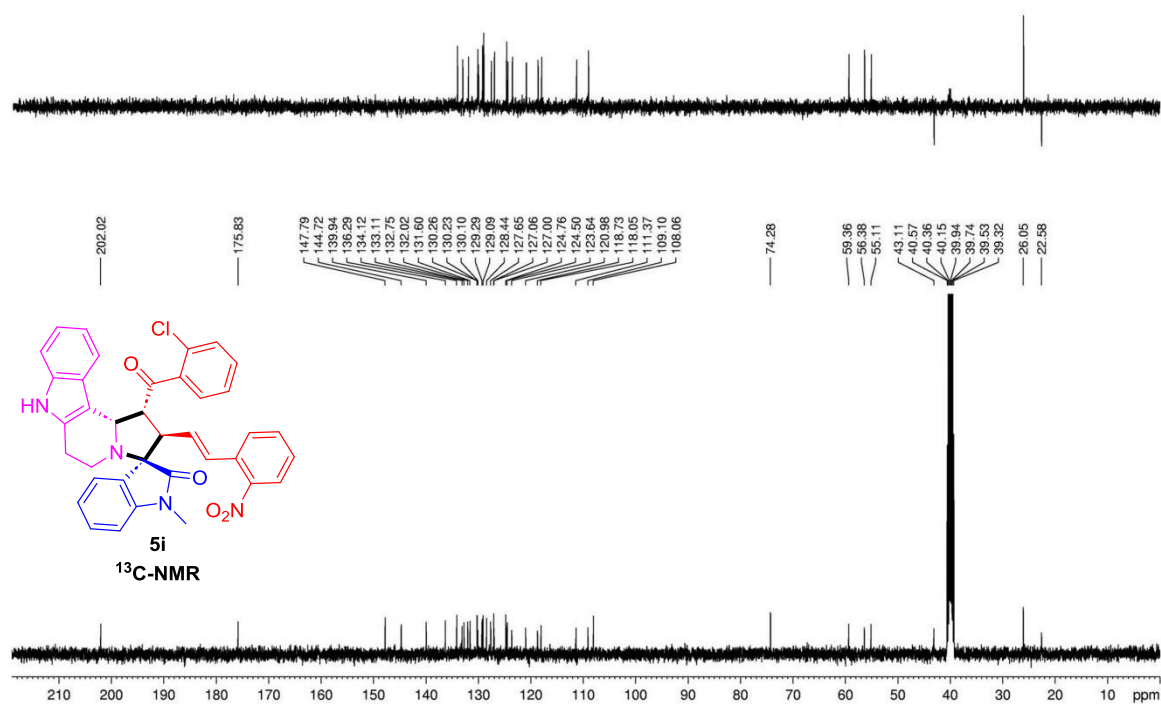





---

The following ALERTS were generated. Each ALERT has the format  
**test-name\_ALERT\_alert-type\_alert-level**.  
Click on the hyperlinks for more details of the test.

---

**Alert level B**

PLAT196\_ALERT\_1\_B No TEMP record and \_measurement\_temperature .NE. 293 Degree

---

**Alert level C**

PLAT029\_ALERT\_3\_C \_diffrn\_measured\_fraction\_theta\_full value Low . 0.966 Why?  
PLAT220\_ALERT\_2\_C NonSolvent Resd 1 0 Ueq(max)/Ueq(min) Range 3.8 Ratio  
PLAT230\_ALERT\_2\_C Hirshfeld Test Diff for N42 --C30 . 5.5 s.u.  
PLAT242\_ALERT\_2\_C Low 'MainMol' Ueq as Compared to Neighbors of N42 Check  
PLAT906\_ALERT\_3\_C Large K Value in the Analysis of Variance ..... 2.957 Check  
PLAT911\_ALERT\_3\_C Missing FCF Refl Between Thmin & STh/L= 0.600 9 Report  
-8 2 9, 0 10 12, 8 11 12, -5 -3 13, 0 10 13, -4 -2 14,  
5 10 14, 6 10 14, 5 9 15,

---

**Alert level G**

PLAT068\_ALERT\_1\_G Reported F000 Differs from Calcd (or Missing)... Please Check  
PLAT072\_ALERT\_2\_G SHELXL First Parameter in WGHT Unusually Large 0.10 Report  
PLAT073\_ALERT\_1\_G H-atoms ref, but \_hydrogen\_treatment Reported as constr Check  
PLAT180\_ALERT\_4\_G Check Cell Rounding: # of Values Ending with 0 = 4 Note  
PLAT769\_ALERT\_4\_G CIF Embedded Explicitly Supplied Scattering Data Please Note  
PLAT912\_ALERT\_4\_G Missing # of FCF Reflections Above STh/L= 0.600 229 Note  
PLAT941\_ALERT\_3\_G Average HKL Measurement Multiplicity ..... 4.8 Low  
PLAT969\_ALERT\_5\_G The 'Henn et al.' R-Factor-gap value ..... 4.04 Note  
Predicted wR2: Based on SigI\*\*2 4.55 or SHELX Weight 18.24  
PLAT978\_ALERT\_2\_G Number C-C Bonds with Positive Residual Density. 9 Info  
PLAT982\_ALERT\_1\_G The C-f' = 0.0192 Deviates from IT-value = 0.0181 Check  
PLAT982\_ALERT\_1\_G The N-f' = 0.0326 Deviates from IT-value = 0.0311 Check  
PLAT982\_ALERT\_1\_G The O-f' = 0.0524 Deviates from IT-value = 0.0492 Check  
PLAT983\_ALERT\_1\_G The O-f" = 0.0338 Deviates from IT-Value = 0.0322 Check

---

- 0 **ALERT level A** = Most likely a serious problem - resolve or explain  
1 **ALERT level B** = A potentially serious problem, consider carefully  
6 **ALERT level C** = Check. Ensure it is not caused by an omission or oversight  
13 **ALERT level G** = General information/check it is not something unexpected
- 7 ALERT type 1 CIF construction/syntax error, inconsistent or missing data  
5 ALERT type 2 Indicator that the structure model may be wrong or deficient  
4 ALERT type 3 Indicator that the structure quality may be low  
3 ALERT type 4 Improvement, methodology, query or suggestion  
1 ALERT type 5 Informative message, check
-

It is advisable to attempt to resolve as many as possible of the alerts in all categories. Often the minor alerts point to easily fixed oversights, errors and omissions in your CIF or refinement strategy, so attention to these fine details can be worthwhile. In order to resolve some of the more serious problems it may be necessary to carry out additional measurements or structure refinements. However, the purpose of your study may justify the reported deviations and the more serious of these should normally be commented upon in the discussion or experimental section of a paper or in the "special\_details" fields of the CIF. checkCIF was carefully designed to identify outliers and unusual parameters, but every test has its limitations and alerts that are not important in a particular case may appear. Conversely, the absence of alerts does not guarantee there are no aspects of the results needing attention. It is up to the individual to critically assess their own results and, if necessary, seek expert advice.

#### **Publication of your CIF in IUCr journals**

A basic structural check has been run on your CIF. These basic checks will be run on all CIFs submitted for publication in IUCr journals (*Acta Crystallographica*, *Journal of Applied Crystallography*, *Journal of Synchrotron Radiation*); however, if you intend to submit to *Acta Crystallographica Section C* or *E* or *IUCrData*, you should make sure that full publication checks are run on the final version of your CIF prior to submission.

#### **Publication of your CIF in other journals**

Please refer to the *Notes for Authors* of the relevant journal for any special instructions relating to CIF submission.

---

**PLATON version of 06/01/2024; check.def file version of 05/01/2024**

Datablock b - ellipsoid plot

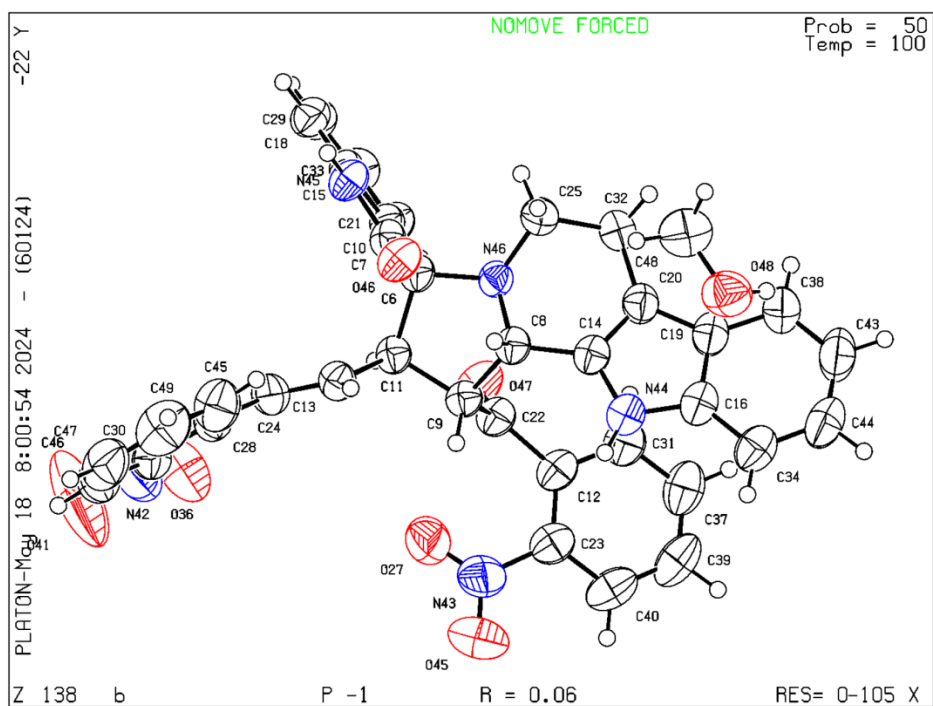

Supplement: d4ob02099e1.pdf [file d4ob02099e1.pdf]
